# Supplementary material
Source: MDPI journal article supplement (https://www.mdpi.com/2304-6740/11/9/364)
Supplement: s1 [file s1]

# Supporting Information

## Isocyanide Cycloaddition and Coordination Processes at Trigonal Phosphinidene-Bridged MoRe and MoMn Complexes

M. Angeles Alvarez, M. Esther García, Daniel García-Vivó,\* Miguel A. Ruiz,\* and Patricia Vega

*Departamento de Química Orgánica e Inorgánica/IUQOEM, Universidad de Oviedo, E-33071 Oviedo, Spain.*

*Corresponding Author E-mail:* [garciavdaniel@uniovi.es](mailto:garciavdaniel@uniovi.es) (D.G.-V.); [mara@uniovi.es](mailto:mara@uniovi.es) (M.A.R.)

**Table S1.** Crystal Data for New Compounds

| <b>5a.1</b>                                                    |                                                                                 |
|----------------------------------------------------------------|---------------------------------------------------------------------------------|
| mol formula                                                    | C <sub>37</sub> H <sub>41</sub> MoNO <sub>7</sub> Pre                           |
| mol wt                                                         | 924.82                                                                          |
| cryst syst                                                     | triclinic                                                                       |
| space group                                                    | <i>P</i> −1                                                                     |
| radiation ( $\lambda$ , Å)                                     | 1.54184                                                                         |
| <i>a</i> , Å                                                   | 8.9166(2)                                                                       |
| <i>b</i> , Å                                                   | 12.7525(4)                                                                      |
| <i>c</i> , Å                                                   | 17.1297(5)                                                                      |
| $\alpha$ , deg                                                 | 75.851(3)                                                                       |
| $\beta$ , deg                                                  | 82.477(2)                                                                       |
| $\gamma$ , deg                                                 | 87.540(2)                                                                       |
| <i>V</i> , Å <sup>3</sup>                                      | 1872.33(9)                                                                      |
| <i>Z</i>                                                       | 2                                                                               |
| calcd density, g cm <sup>−3</sup>                              | 1.640                                                                           |
| absorp coeff, mm <sup>−1</sup>                                 | 9.756                                                                           |
| temperature, K                                                 | 153(4)                                                                          |
| $\theta$ range (deg)                                           | 3.5700 / 69.4730                                                                |
| index ranges ( <i>h</i> , <i>k</i> , <i>l</i> )                | −10, 10; −15, 15<br>−18, 20                                                     |
| no. of reflns collected                                        | 18192                                                                           |
| no. of indep reflns ( <i>R</i> <sub>int</sub> )                | 6940(0.0548)                                                                    |
| reflns with $I > 2\sigma(I)$                                   | 6250                                                                            |
| <i>R</i> indexes<br>[data with $I > 2\sigma(I)$ ] <sup>a</sup> | <i>R</i> <sub>1</sub> = 0.0428<br>w <i>R</i> <sub>2</sub> = 0.1131 <sup>b</sup> |
| <i>R</i> indexes (all data) <sup>a</sup>                       | <i>R</i> <sub>1</sub> = 0.0467<br>w <i>R</i> <sub>2</sub> = 0.1173 <sup>b</sup> |
| GOF                                                            | 1.035                                                                           |
| no. of restraints/params                                       | 0 / 419                                                                         |
| $\Delta\rho$ (max., min.), eÅ <sup>−3</sup>                    | 1.736 / −1.225                                                                  |
| CCDC deposition no                                             | 2283058                                                                         |

<sup>a</sup>  $R = \sum ||F_o| - |F_c|| / \sum |F_o|$ .  $wR = [\sum w(|F_o|^2 - |F_c|^2)^2 / \sum w|F_o|^2]^{1/2}$ .  $w = 1/[\sigma^2(F_o^2) + (aP)^2 + bP]$  where  $P = (F_o^2 + 2F_c^2)/3$ . <sup>b</sup>  $a = 0.0746$ ,  $b = 0.9740$ .

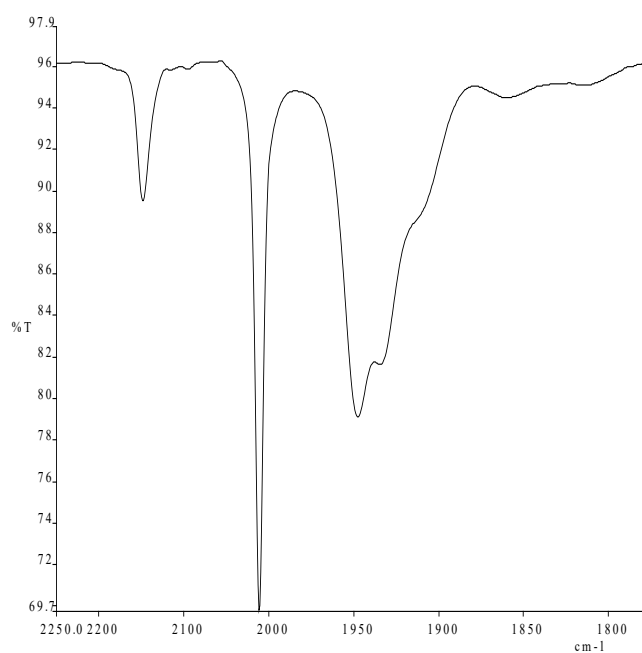

**Figure S1.** IR spectrum of compound **2a.1** in dichloromethane solution.

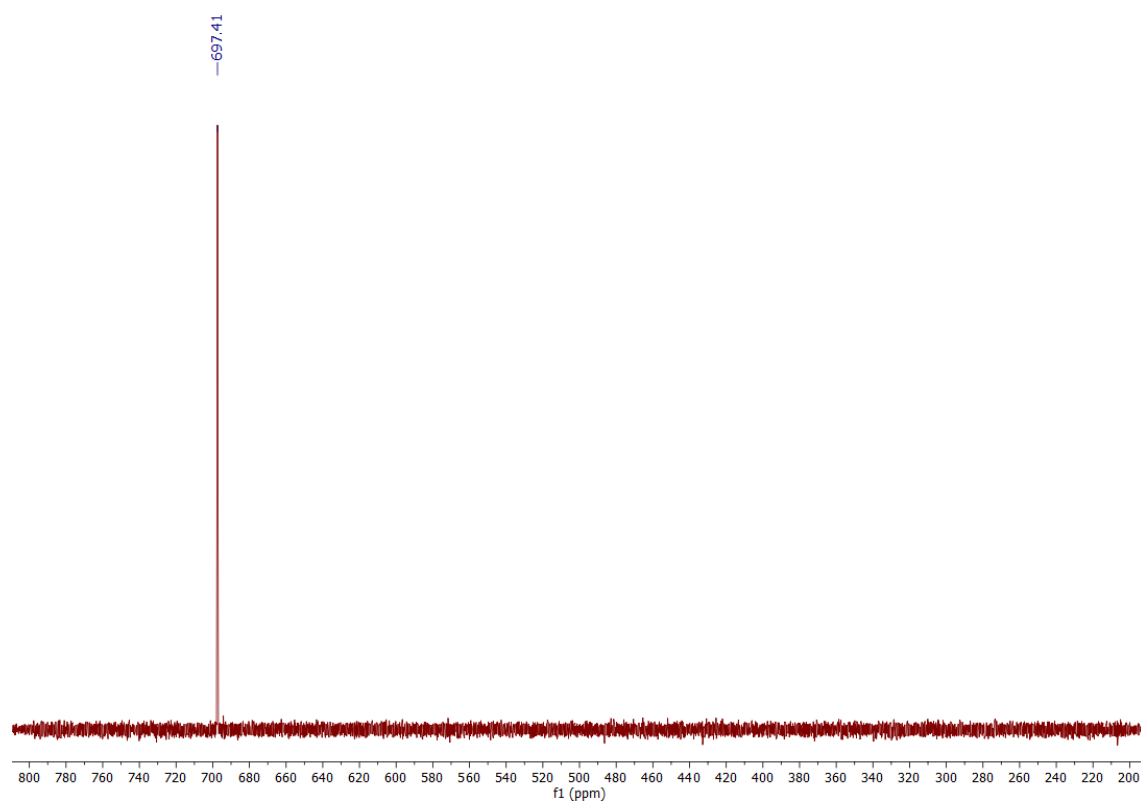

**Figure S2.**  $^{31}\text{P}\{^1\text{H}\}$  NMR spectrum of compound **2a.1** ( $\text{CD}_2\text{Cl}_2$ ).

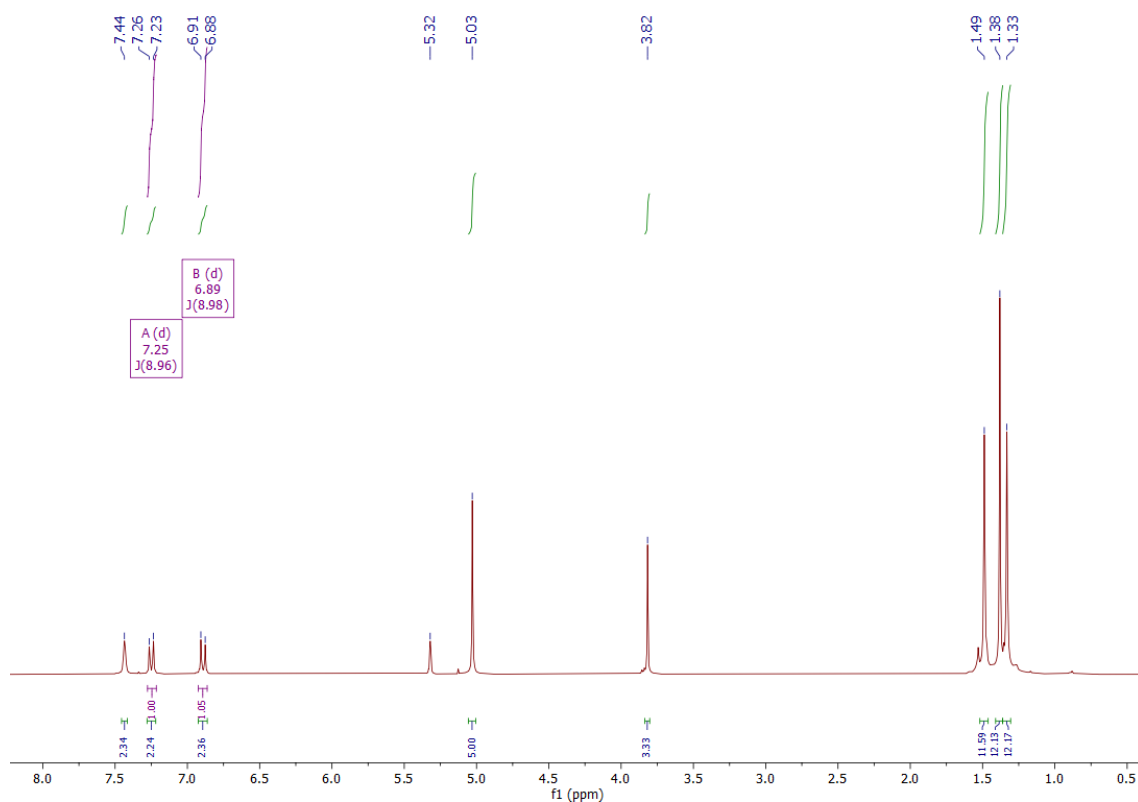

**Figure S3.** <sup>1</sup>H NMR spectrum of compound **2a.1** (CD<sub>2</sub>Cl<sub>2</sub>).

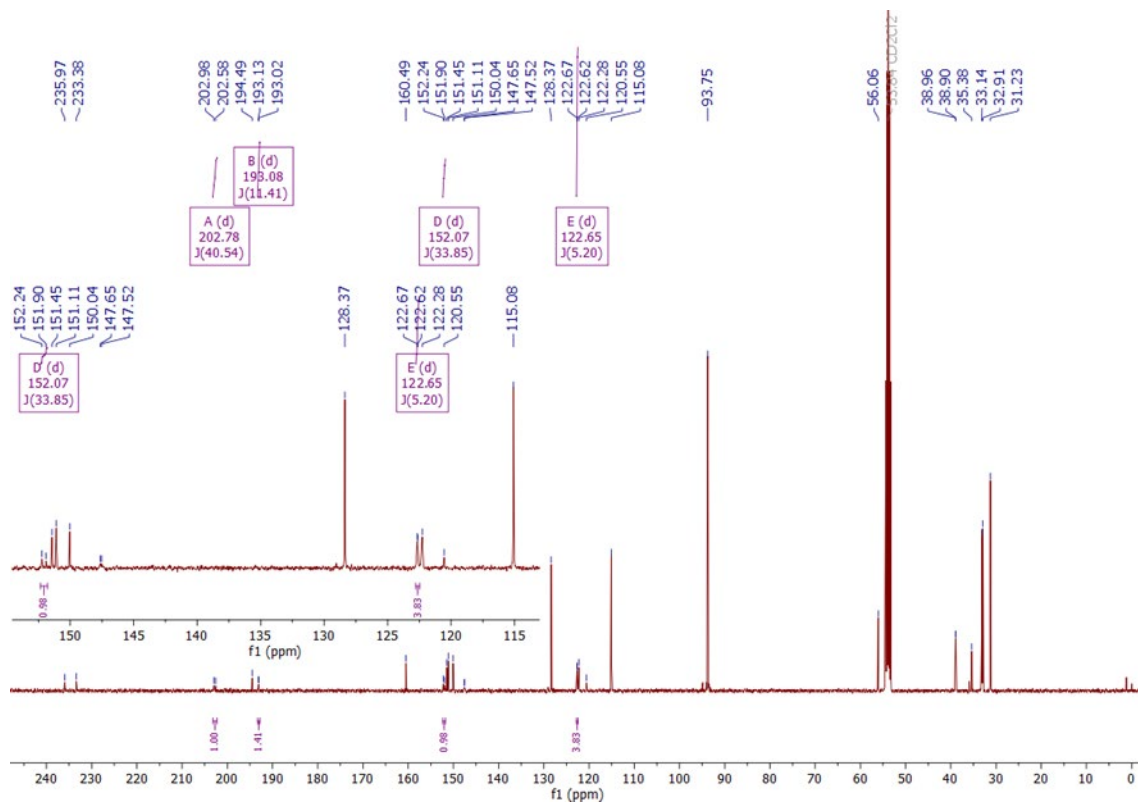

**Figure S4.** <sup>13</sup>C{<sup>1</sup>H} NMR spectrum of compound **2a.1** (CD<sub>2</sub>Cl<sub>2</sub>).

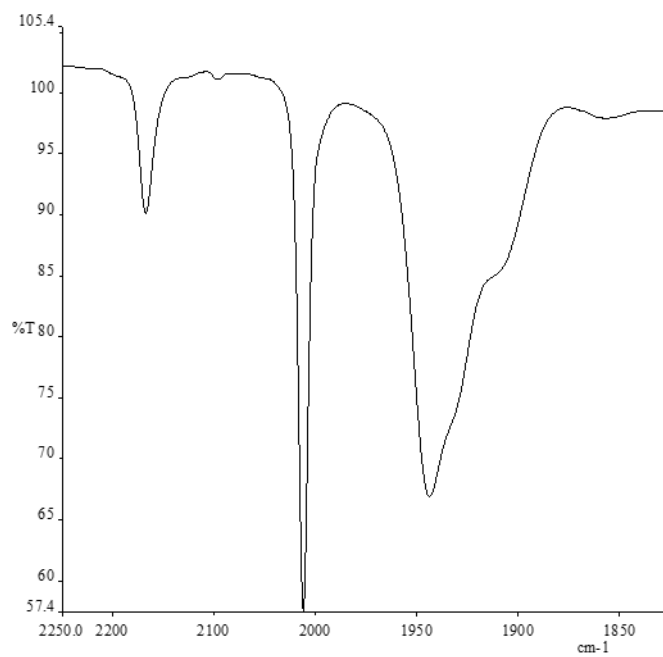

**Figure S5.** IR spectrum of compound **2a.2** in dichloromethane solution.

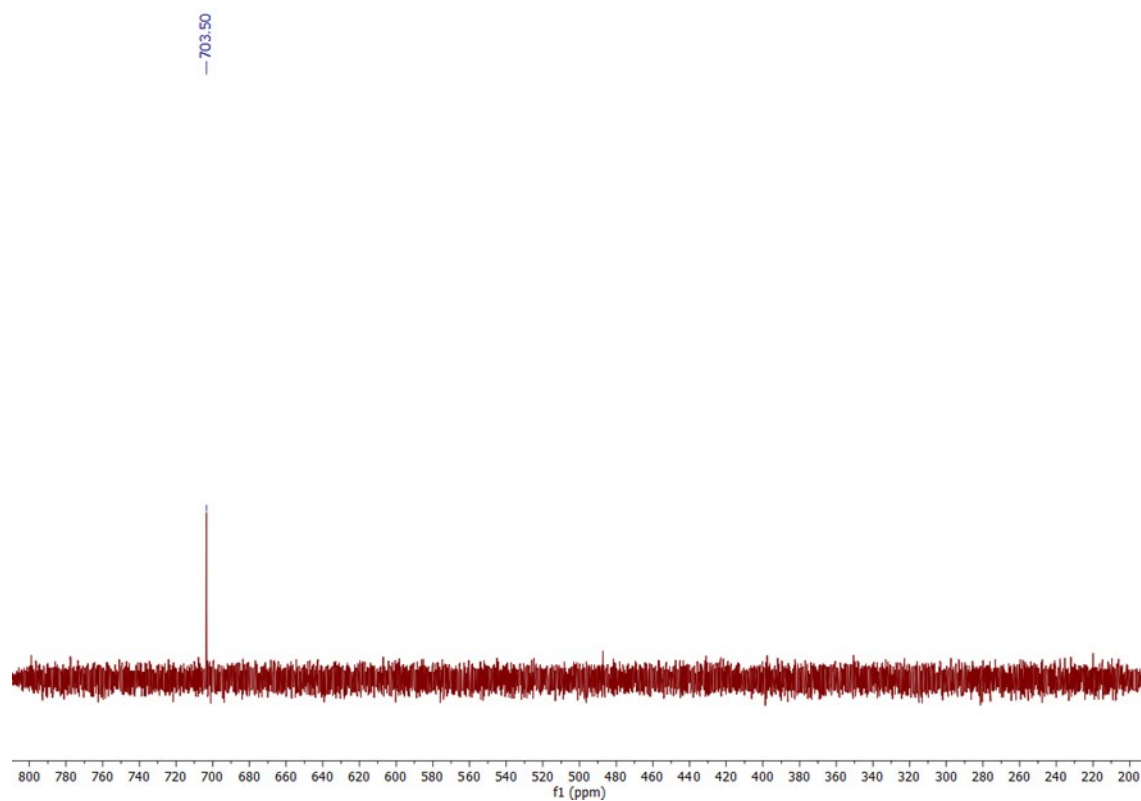

**Figure S6.** <sup>31</sup>P{<sup>1</sup>H} NMR spectrum of compound **2a.2** (CD<sub>2</sub>Cl<sub>2</sub>).

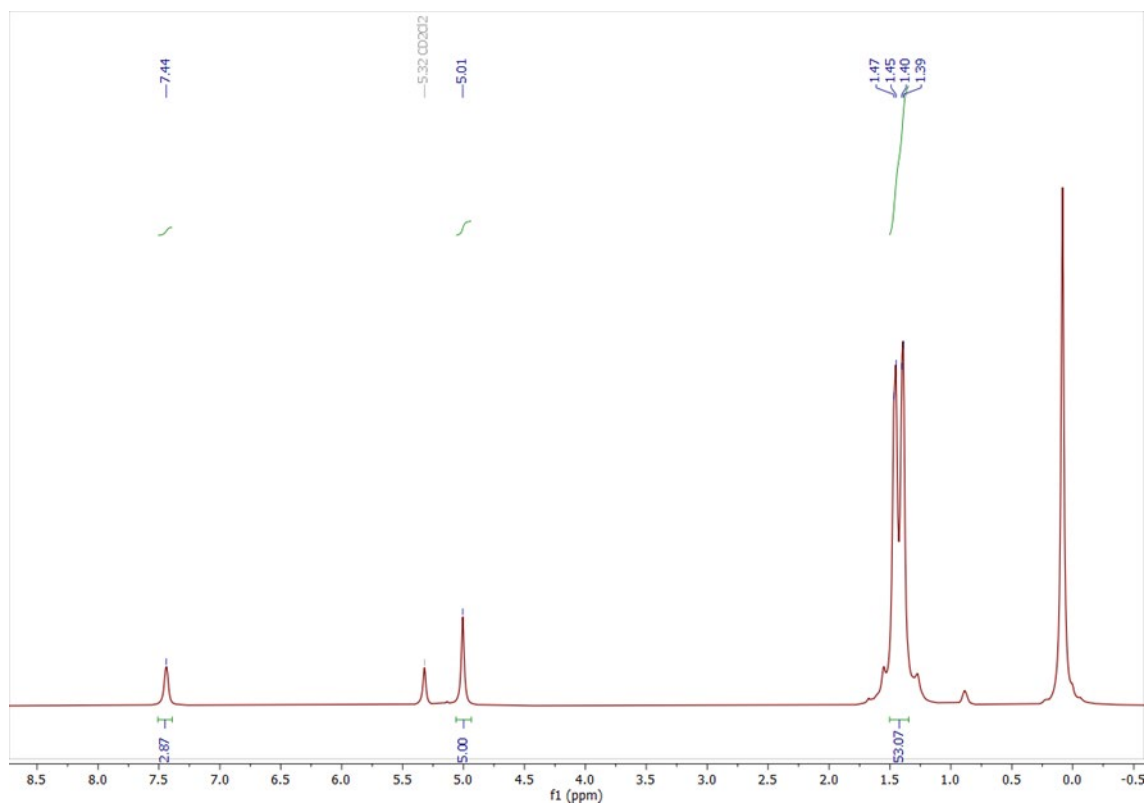

**Figure S7.** <sup>1</sup>H NMR spectrum of compound **2a.2** (CD<sub>2</sub>Cl<sub>2</sub>).

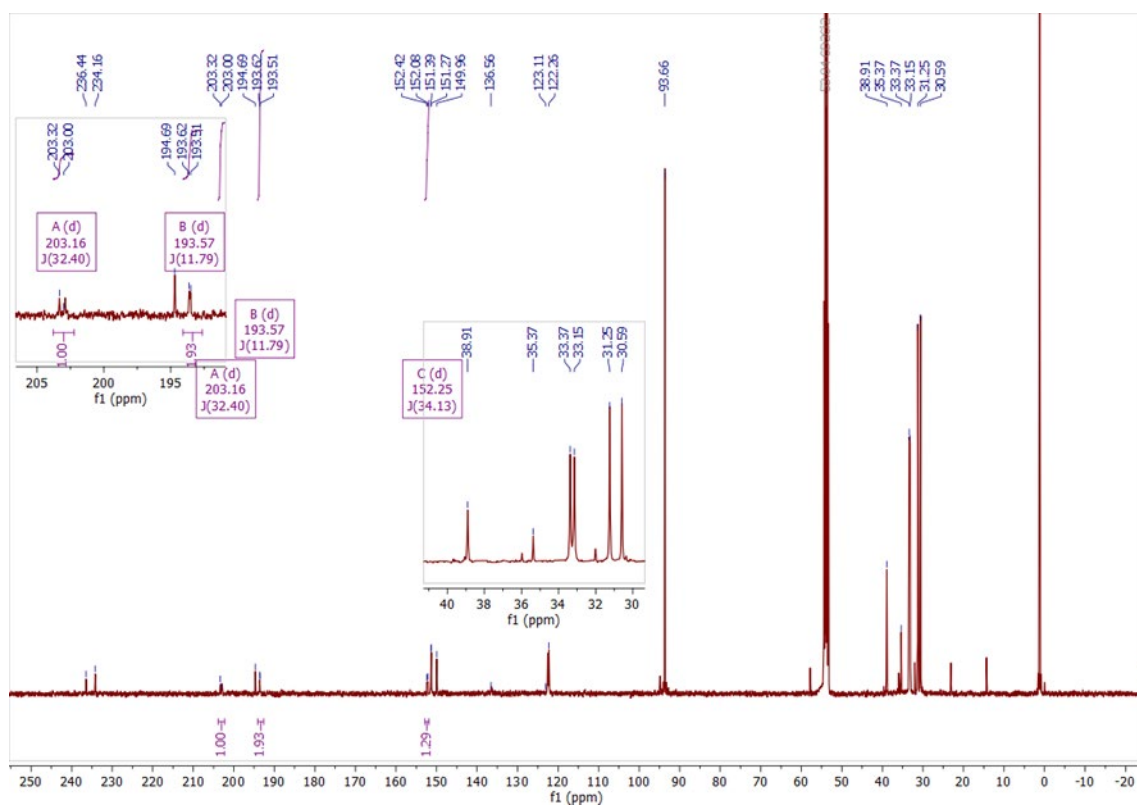

**Figure S8.** <sup>13</sup>C{<sup>1</sup>H} NMR spectrum of compound **2a.2** (CD<sub>2</sub>Cl<sub>2</sub>).

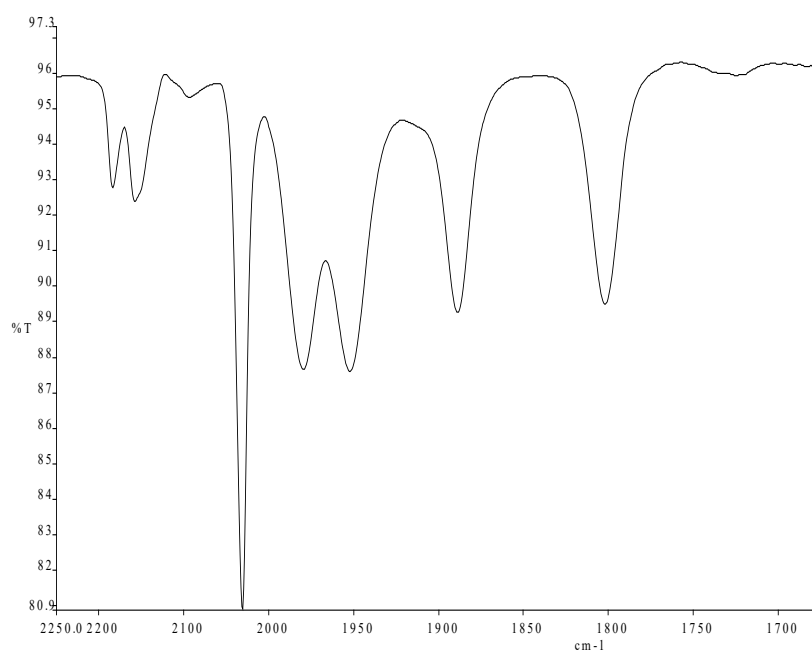

**Figure S9.** IR spectrum of compound **3a.1** in dichloromethane solution.

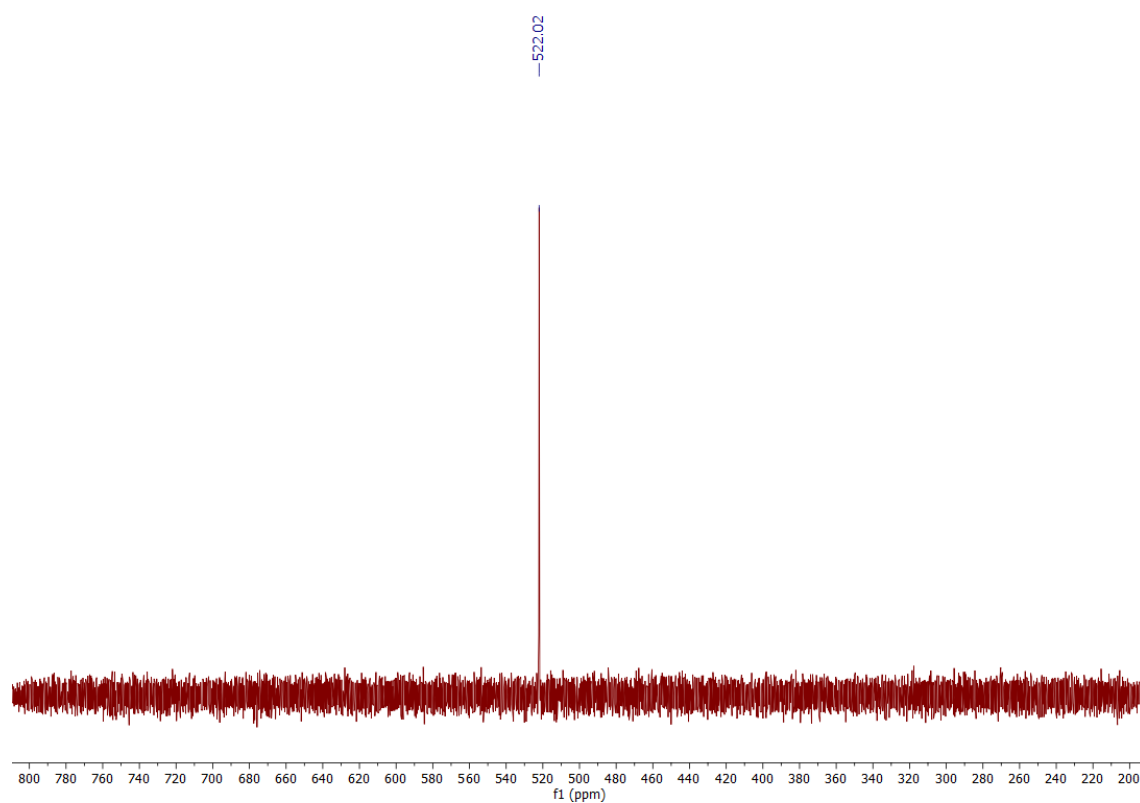

**Figure S10.**  $^{31}\text{P}\{^1\text{H}\}$  NMR spectrum of compound **3a.1** ( $\text{CD}_2\text{Cl}_2$ ).

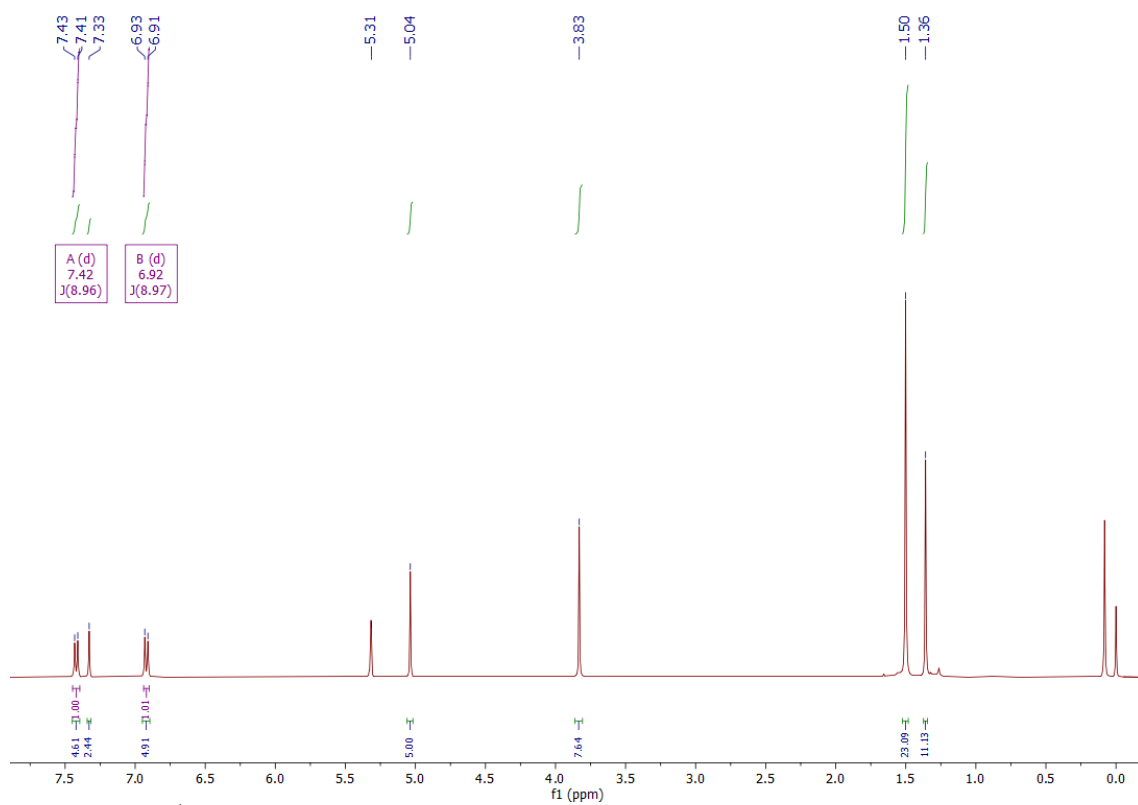

**Figure S11.** <sup>1</sup>H NMR spectrum of compound **3a.1** (CD<sub>2</sub>Cl<sub>2</sub>).

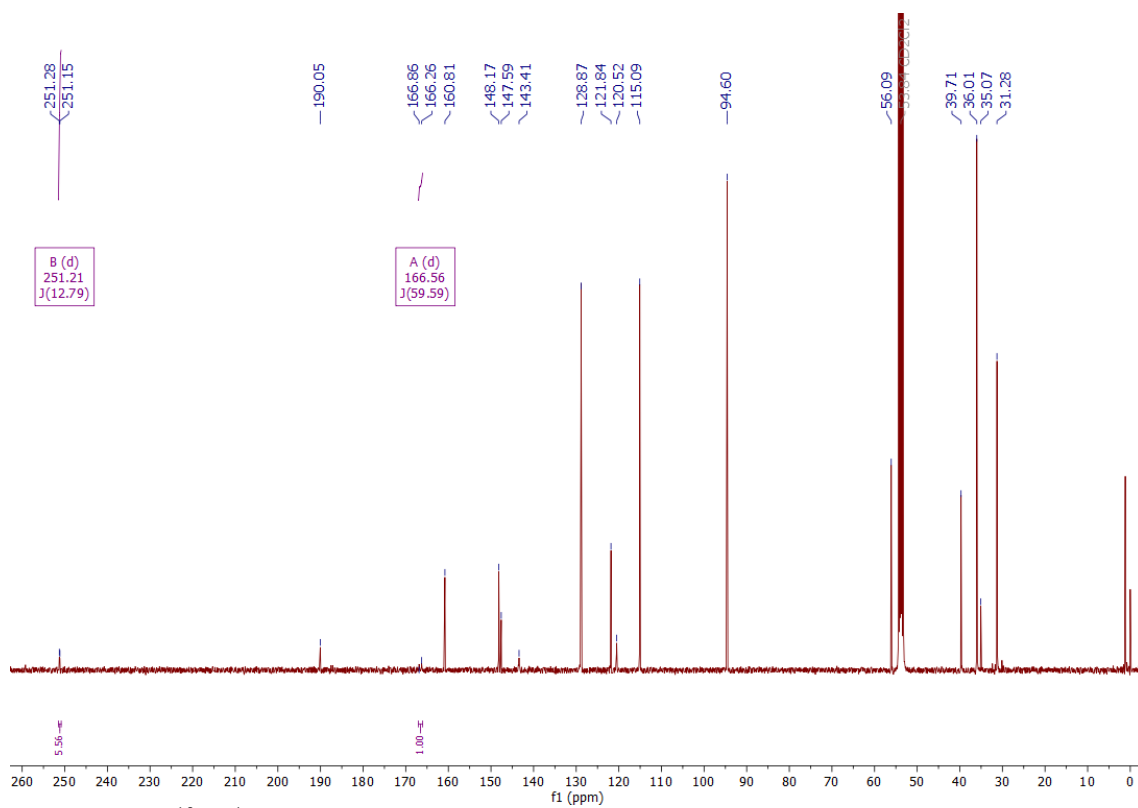

**Figure S12.** <sup>13</sup>C{<sup>1</sup>H} NMR spectrum of compound **3a.1** (CD<sub>2</sub>Cl<sub>2</sub>).



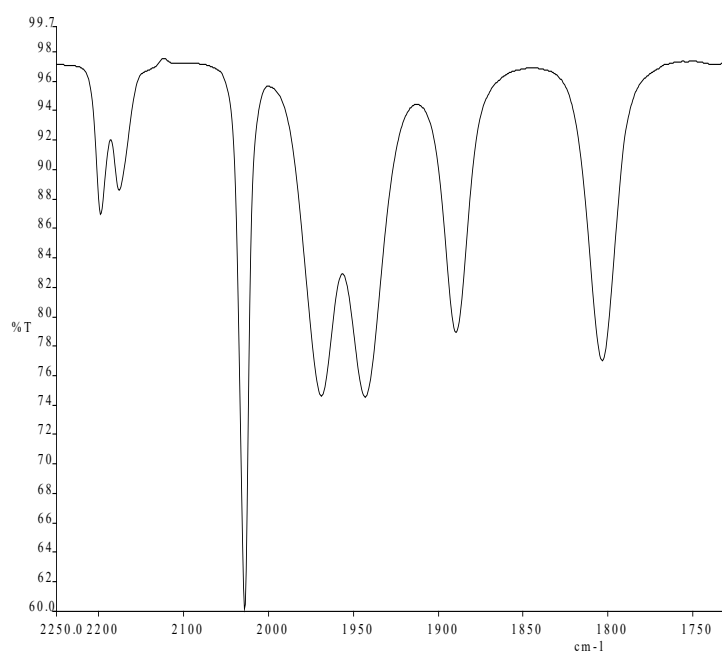

**Figure S13.** IR spectrum of compound **3a.2** in dichloromethane solution.

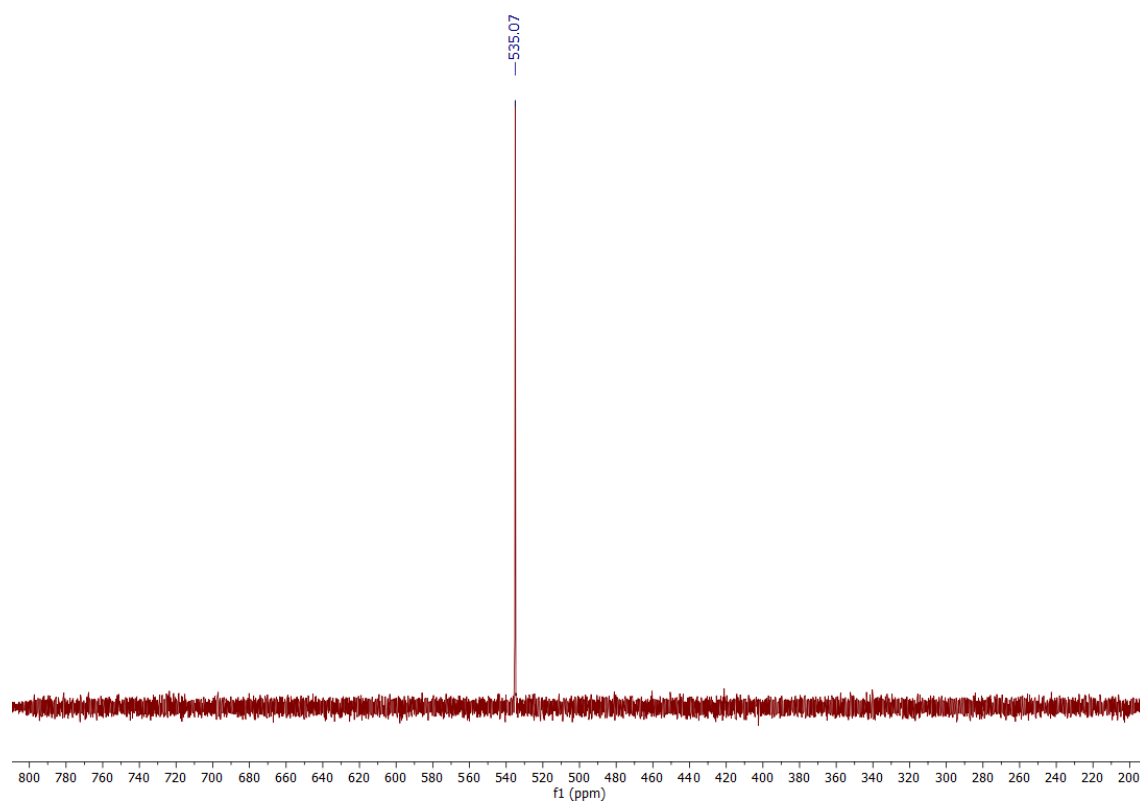

**Figure S14.** <sup>31</sup>P{<sup>1</sup>H} NMR spectrum of compound **3a.2** (CD<sub>2</sub>Cl<sub>2</sub>).

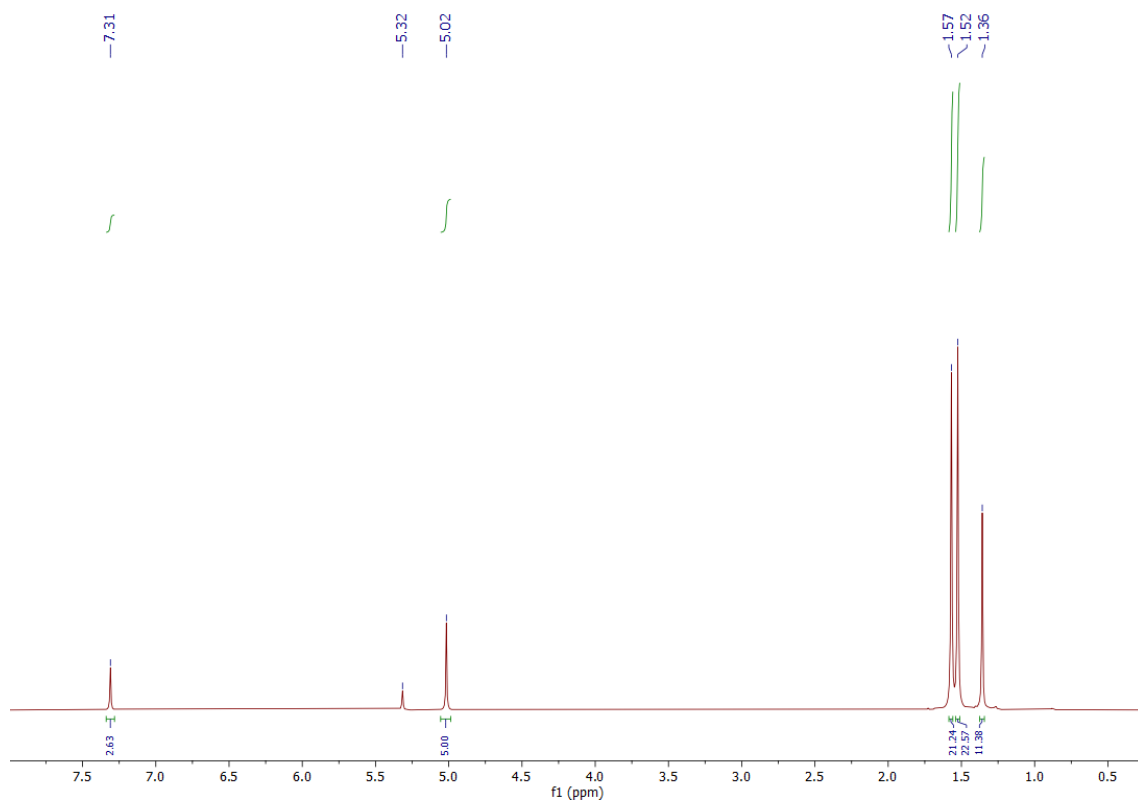

**Figure S15.** <sup>1</sup>H NMR spectrum of compound **3a.2** (CD<sub>2</sub>Cl<sub>2</sub>).

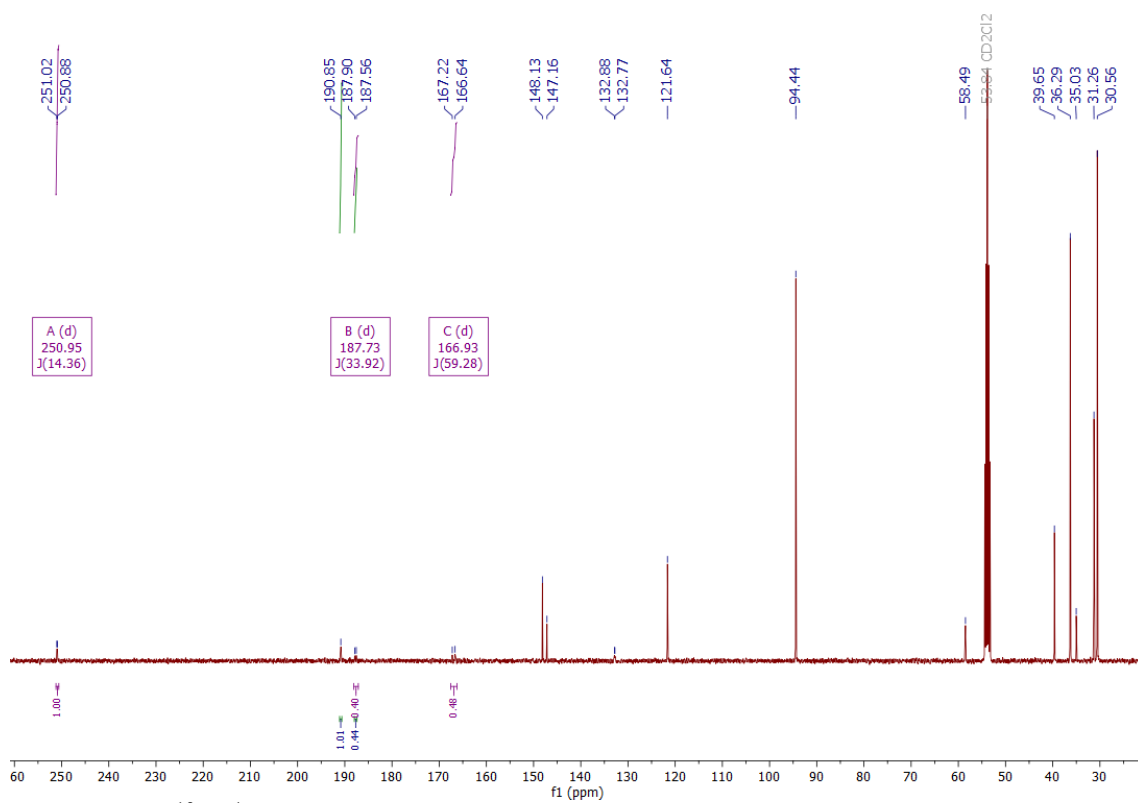

**Figure S16.** <sup>13</sup>C{<sup>1</sup>H} NMR spectrum of compound **3a.2** (CD<sub>2</sub>Cl<sub>2</sub>).

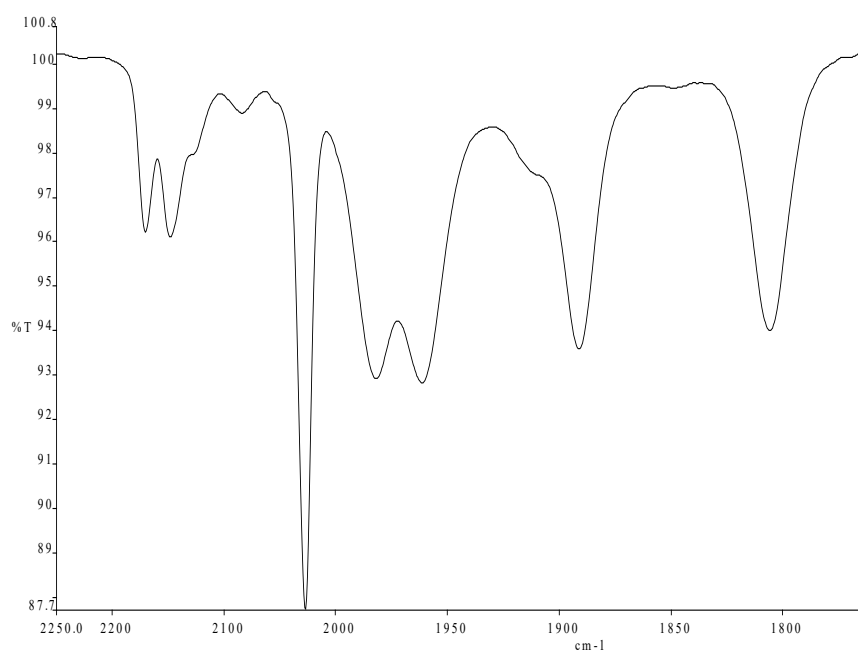

**Figure S17.** IR spectrum of compound **3b.1** in dichloromethane solution.

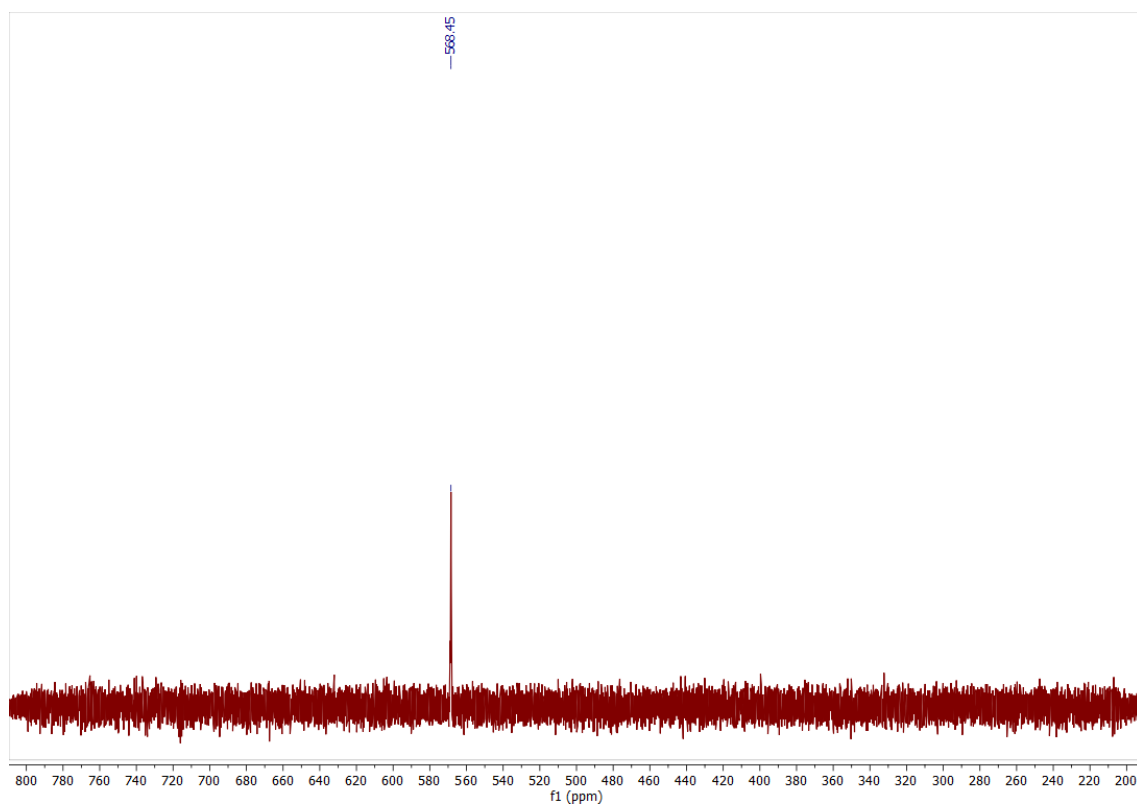

**Figure S18.**  $^{31}\text{P}\{^1\text{H}\}$  NMR spectrum of compound **3b.1** ( $\text{CD}_2\text{Cl}_2$ ).

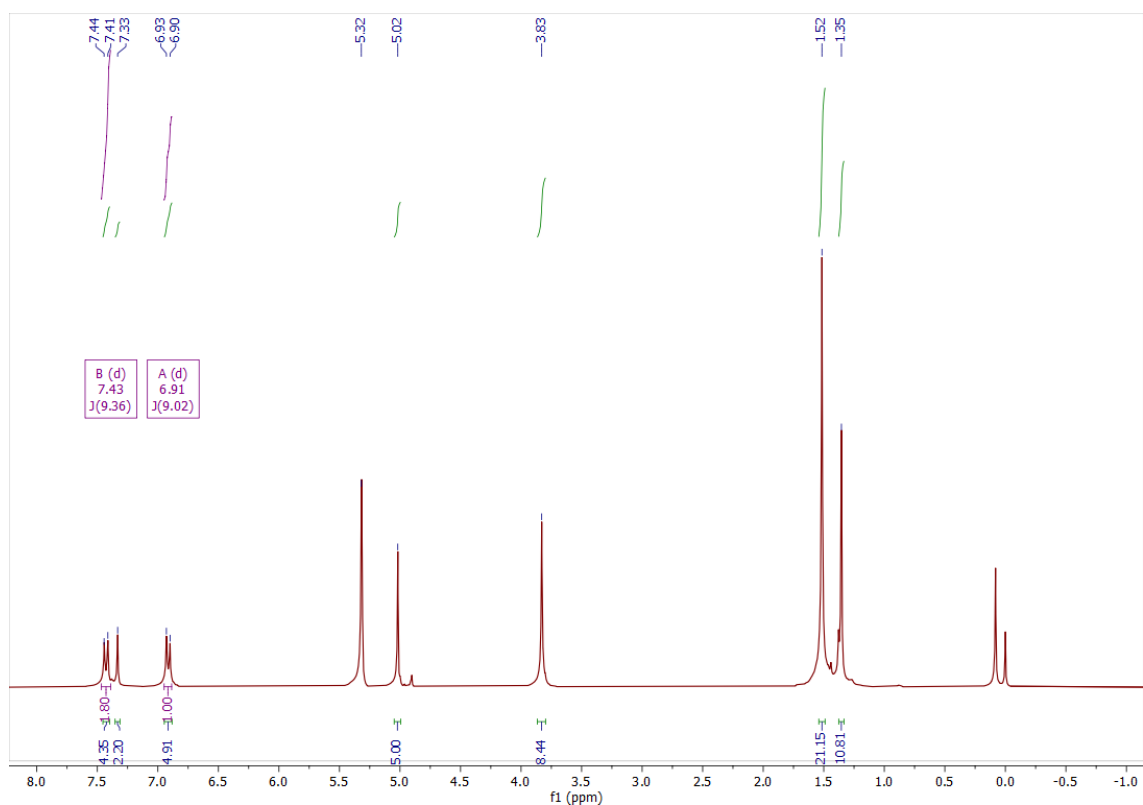

**Figure S19.**  $^1\text{H}$  NMR spectrum of compound **3b.1** ( $\text{CD}_2\text{Cl}_2$ ).

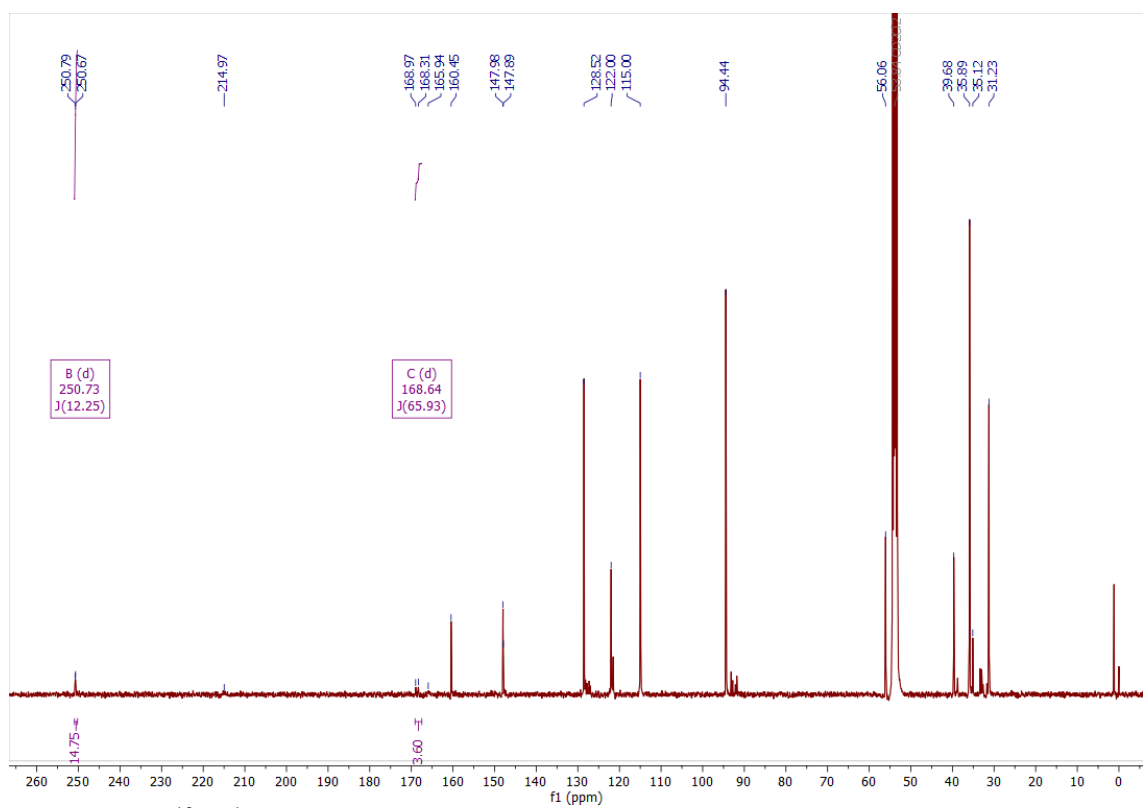

**Figure S20.**  $^{13}\text{C}\{^1\text{H}\}$  NMR spectrum of compound **3b.1** ( $\text{CD}_2\text{Cl}_2$ ).

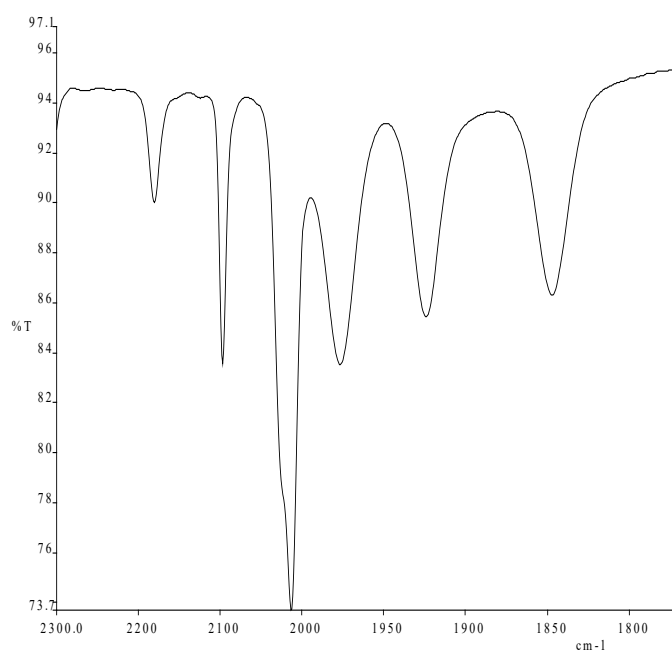

**Figure S21.** IR spectrum of compound **4a.1** in dichloromethane solution.

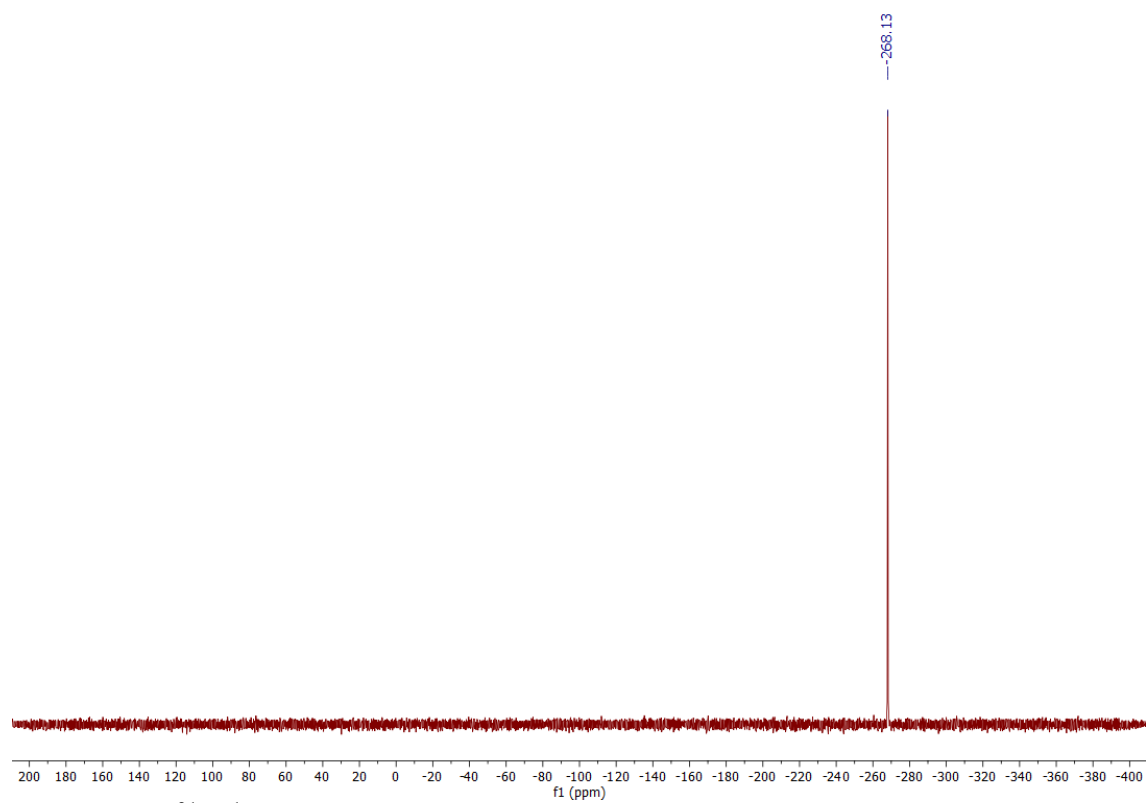

**Figure S22.** <sup>31</sup>P{<sup>1</sup>H} NMR spectrum of compound **4a.1** (CD<sub>2</sub>Cl<sub>2</sub>).

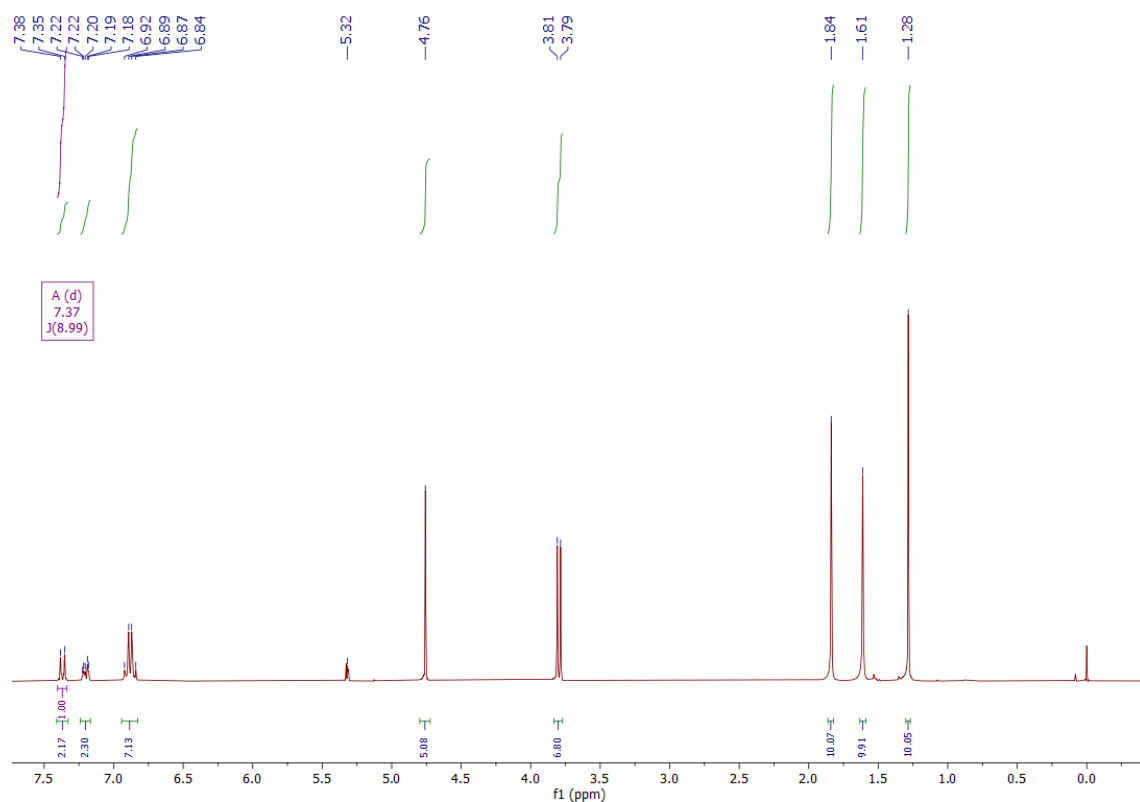

**Figure S23.**  $^1\text{H}$  NMR spectrum of compound **4a.1** ( $\text{CD}_2\text{Cl}_2$ ).

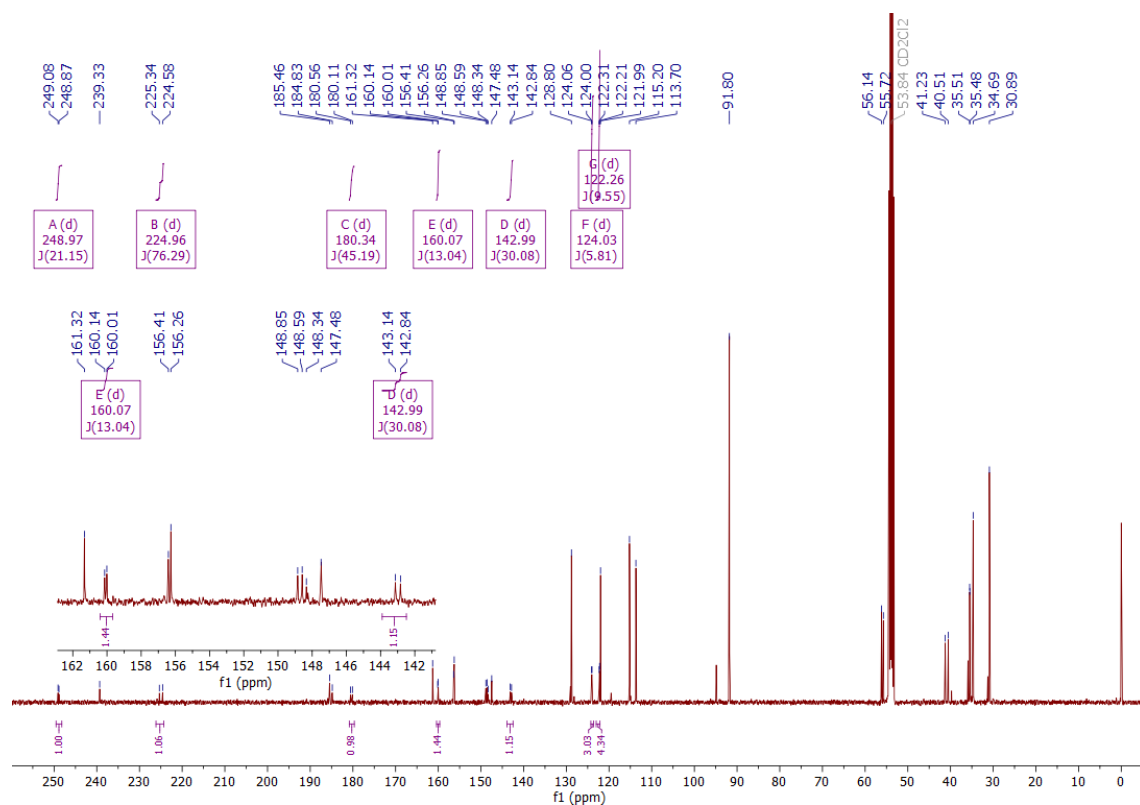

**Figure S24.**  $^{13}\text{C}\{^1\text{H}\}$  NMR spectrum of compound **4a.1** ( $\text{CD}_2\text{Cl}_2$ ).

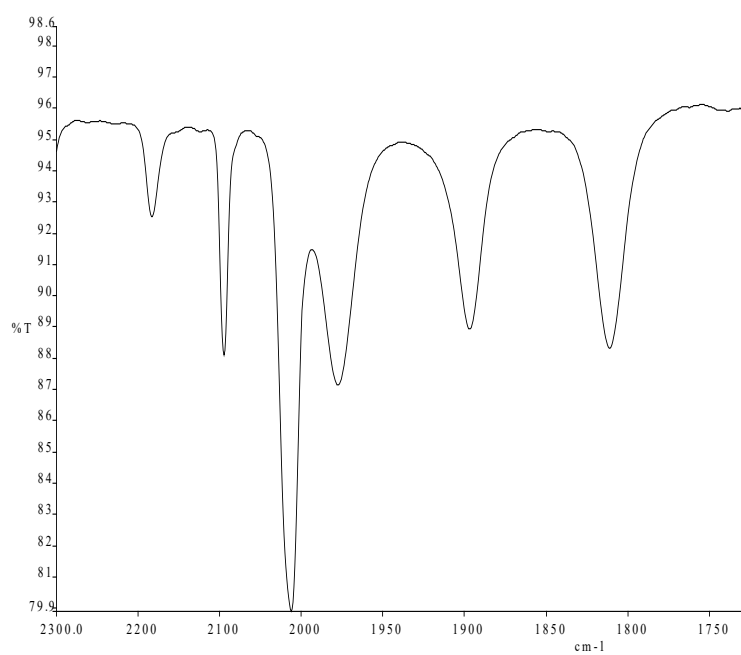

**Figure S25.** IR spectrum of compound **5a.1** in dichloromethane solution.

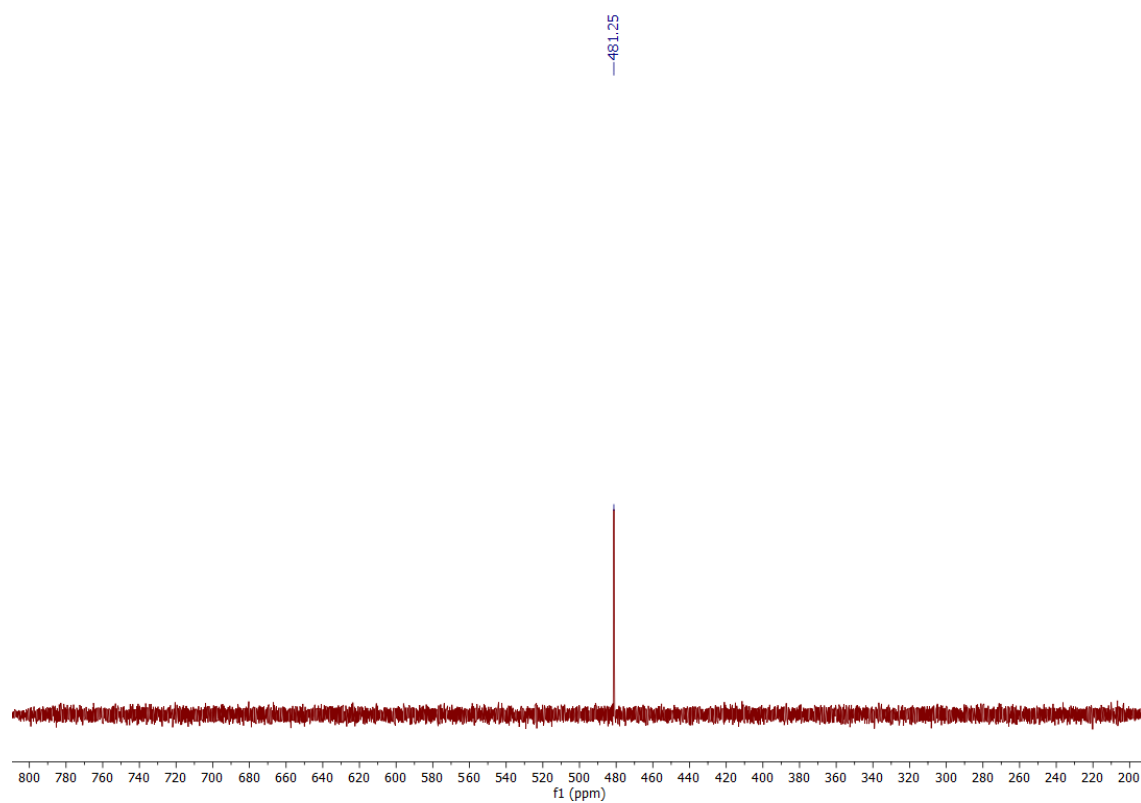

**Figure S26.**  $^{31}\text{P}\{^1\text{H}\}$  NMR spectrum of compound **5a.1** ( $\text{CD}_2\text{Cl}_2$ ).

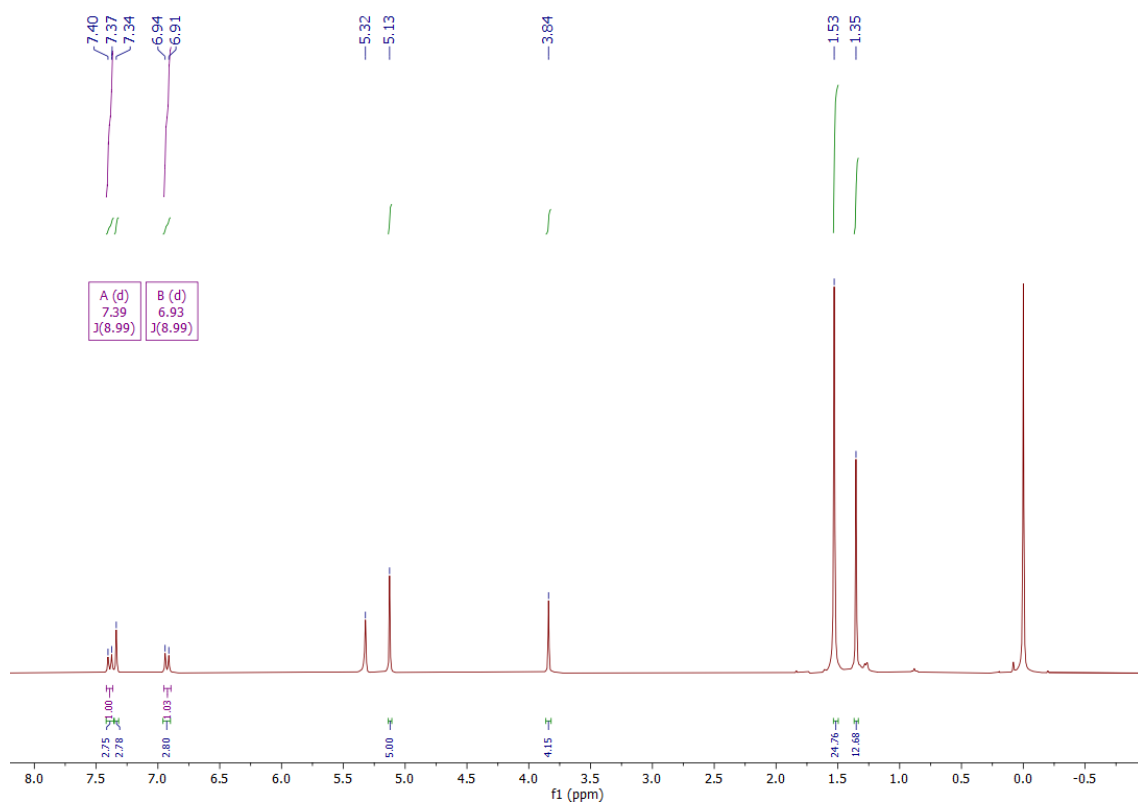

**Figure S27.**  $^1\text{H}$  NMR spectrum of compound **5a.1** ( $\text{CD}_2\text{Cl}_2$ ).

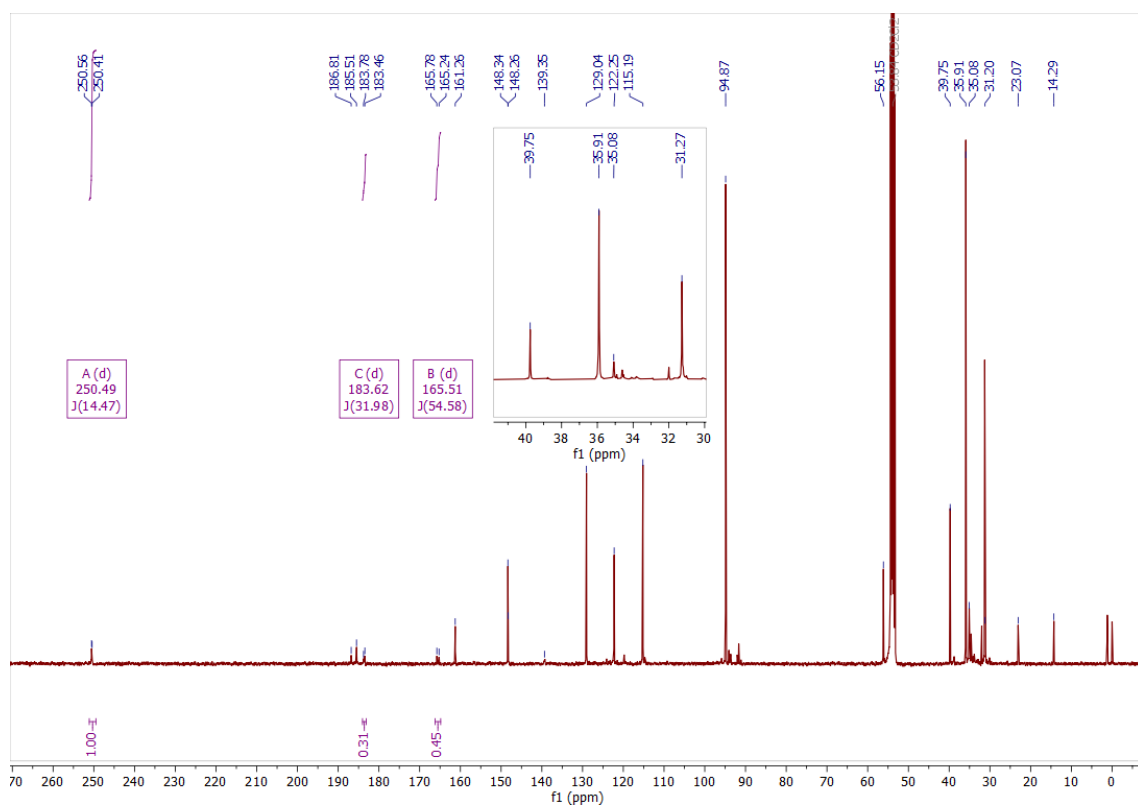

**Figure S28.**  $^{13}\text{C}\{^1\text{H}\}$  NMR spectrum of compound **5a.1** ( $\text{CD}_2\text{Cl}_2$ ).



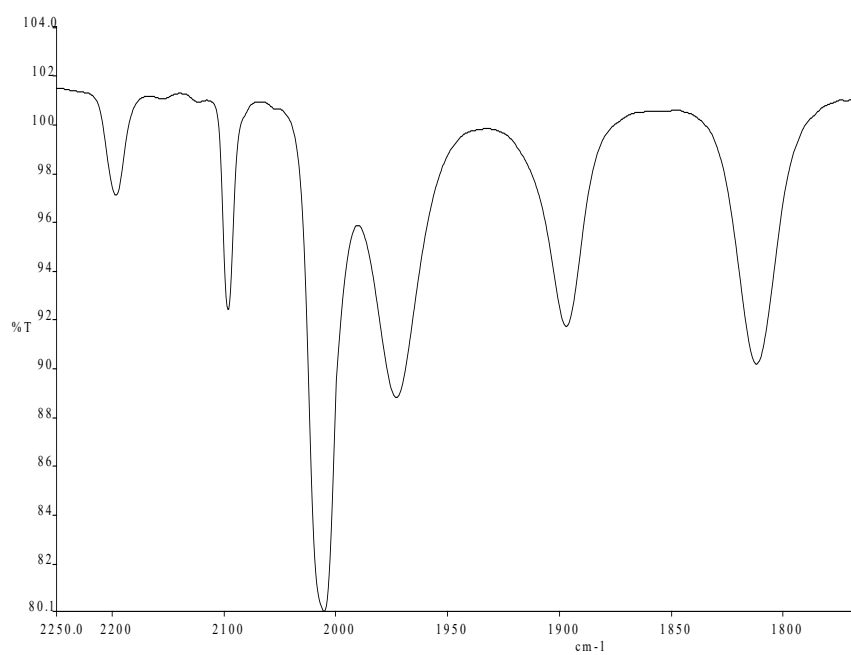

**Figure S29.** IR spectrum of compound **5a.2** in dichloromethane solution.

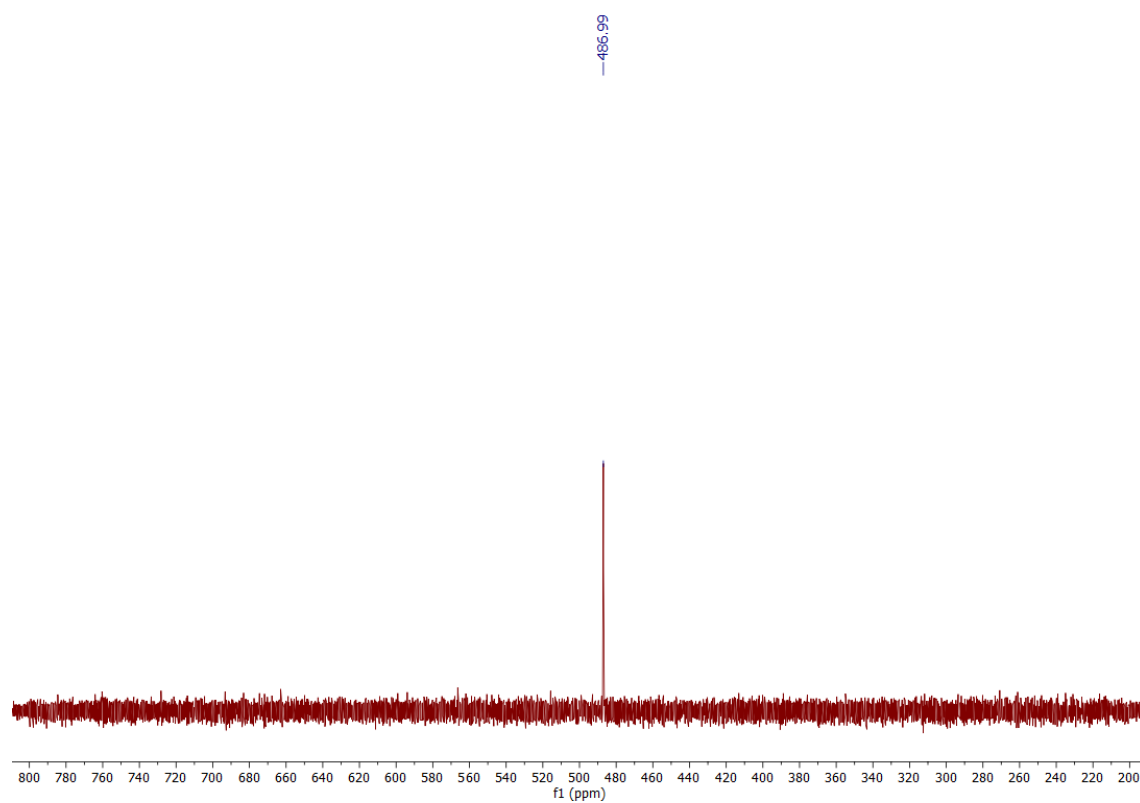

**Figure S30.** <sup>31</sup>P{<sup>1</sup>H} NMR spectrum of compound **5a.2** (CD<sub>2</sub>Cl<sub>2</sub>).

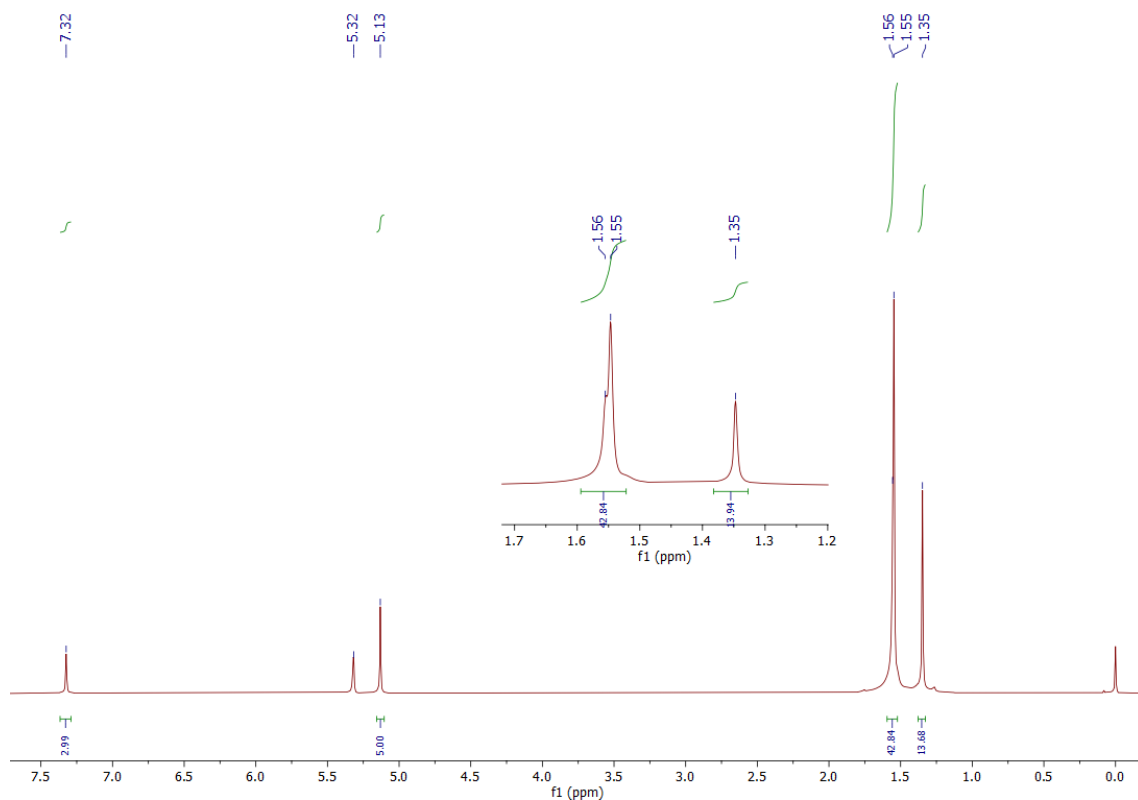

**Figure S31.** <sup>1</sup>H NMR spectrum of compound **5a.2** (CD<sub>2</sub>Cl<sub>2</sub>).

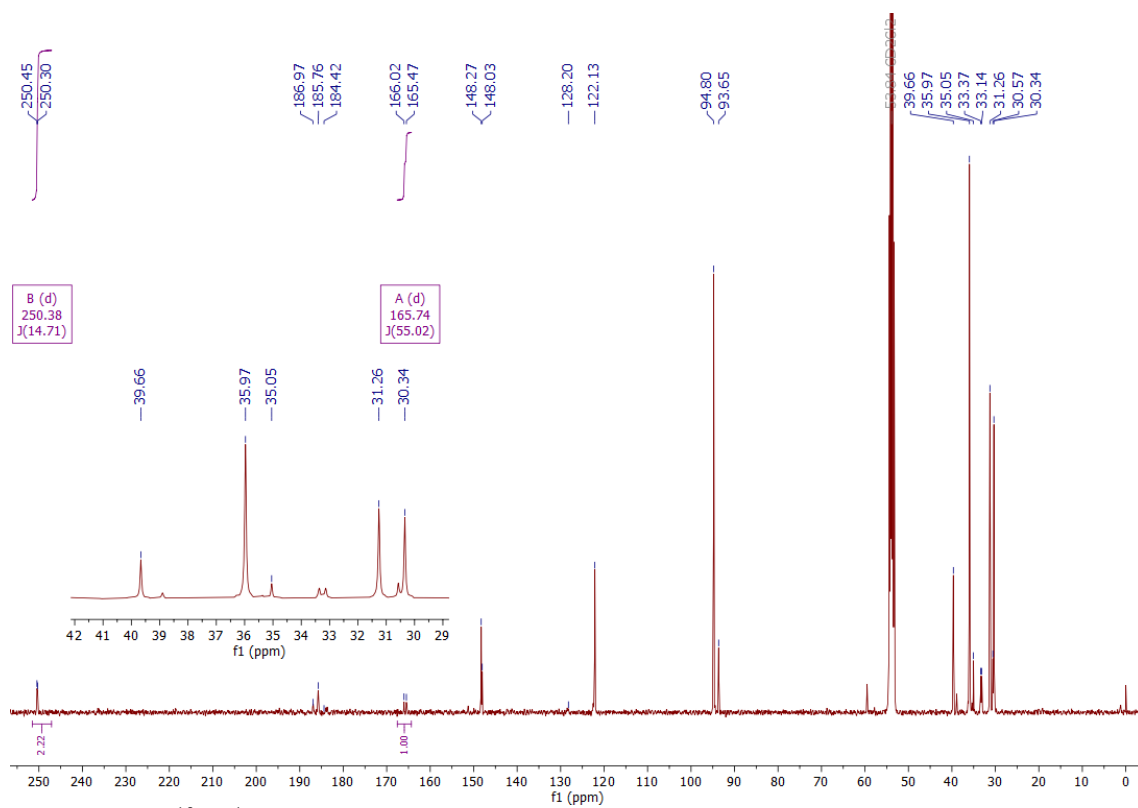

**Figure S32.** <sup>13</sup>C{<sup>1</sup>H} NMR spectrum of compound **5a.2** (CD<sub>2</sub>Cl<sub>2</sub>).

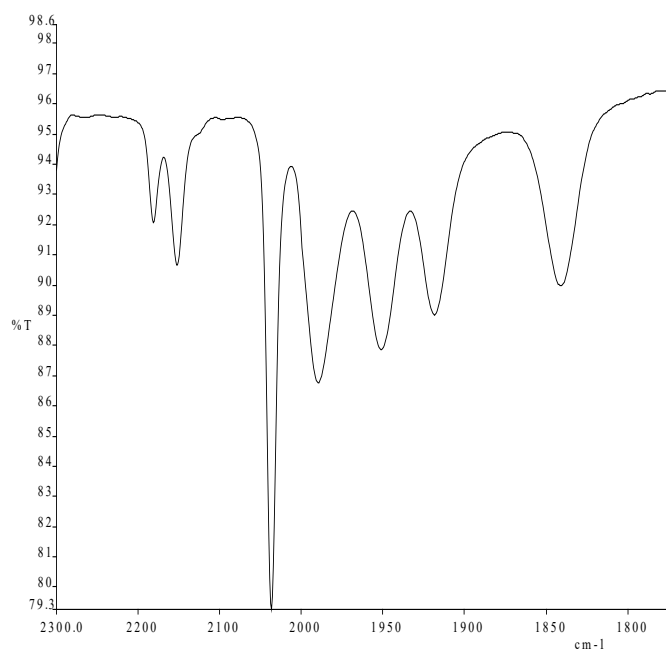

**Figure S33.** IR spectrum of compound **6a.1** in dichloromethane solution.

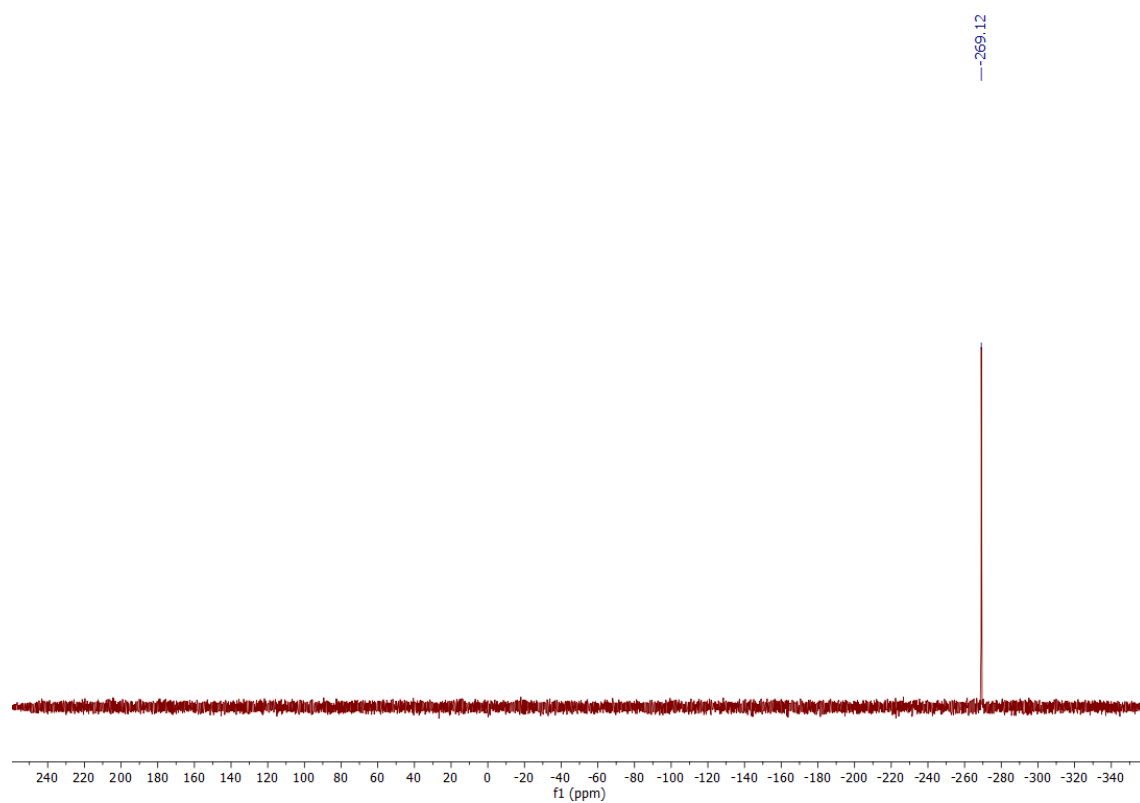

**Figure S34.** <sup>31</sup>P{<sup>1</sup>H} NMR spectrum of compound **6a.1** (CD<sub>2</sub>Cl<sub>2</sub>).

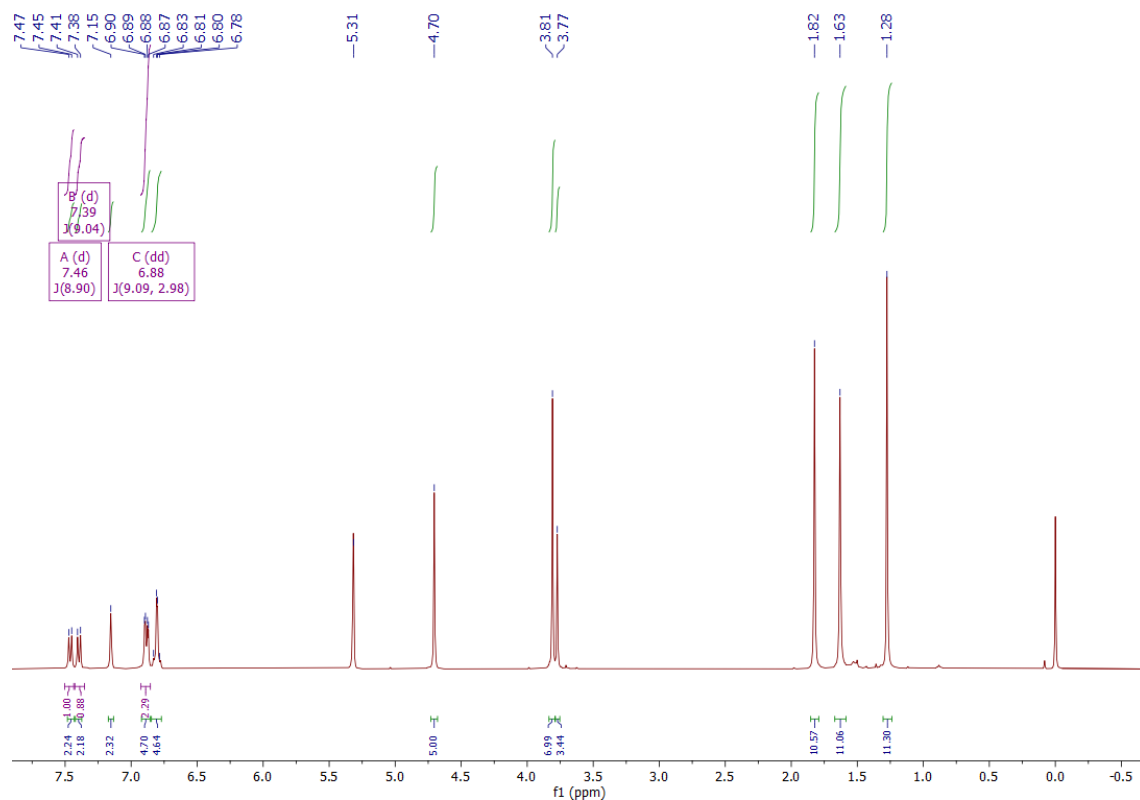

**Figure S35.** <sup>1</sup>H NMR spectrum of compound **6a.1** (CD<sub>2</sub>Cl<sub>2</sub>).

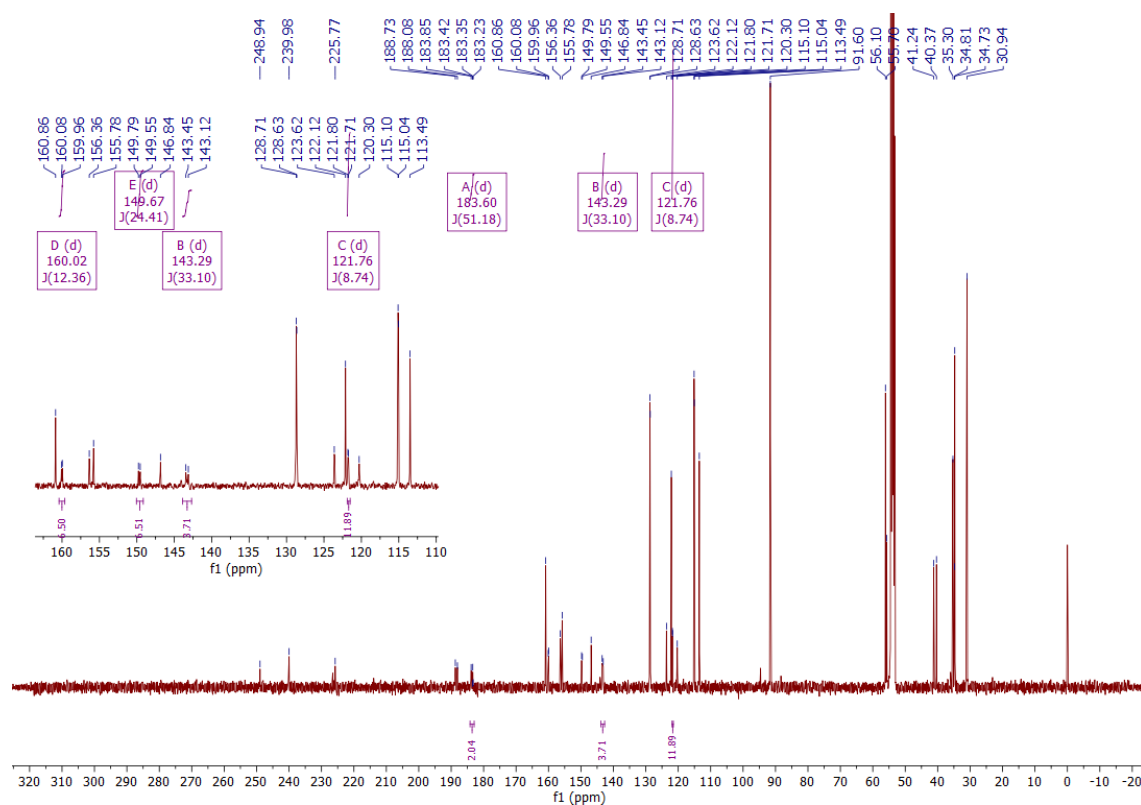

**Figure S36.** <sup>13</sup>C{<sup>1</sup>H} NMR spectrum of compound **6a.1** (CD<sub>2</sub>Cl<sub>2</sub>).

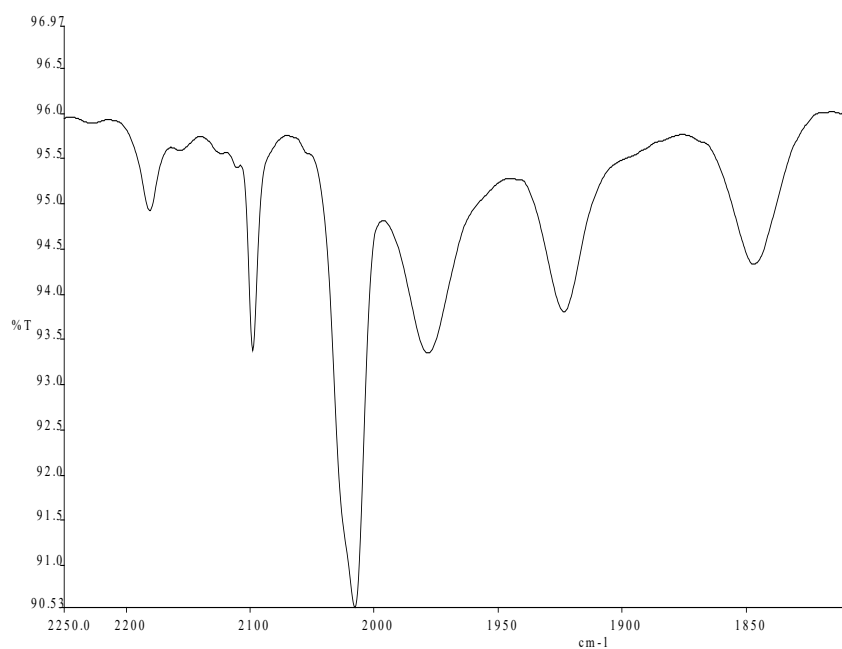

**Figure S37.** IR spectrum of compound **7a.3** in dichloromethane solution.

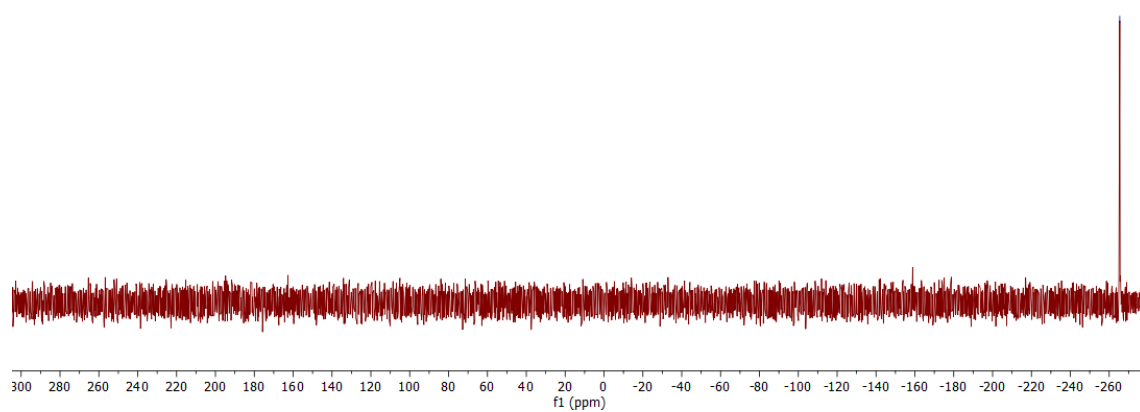

**Figure S38.** <sup>31</sup>P{<sup>1</sup>H} NMR spectrum of compound **7a.3** (CD<sub>2</sub>Cl<sub>2</sub>).

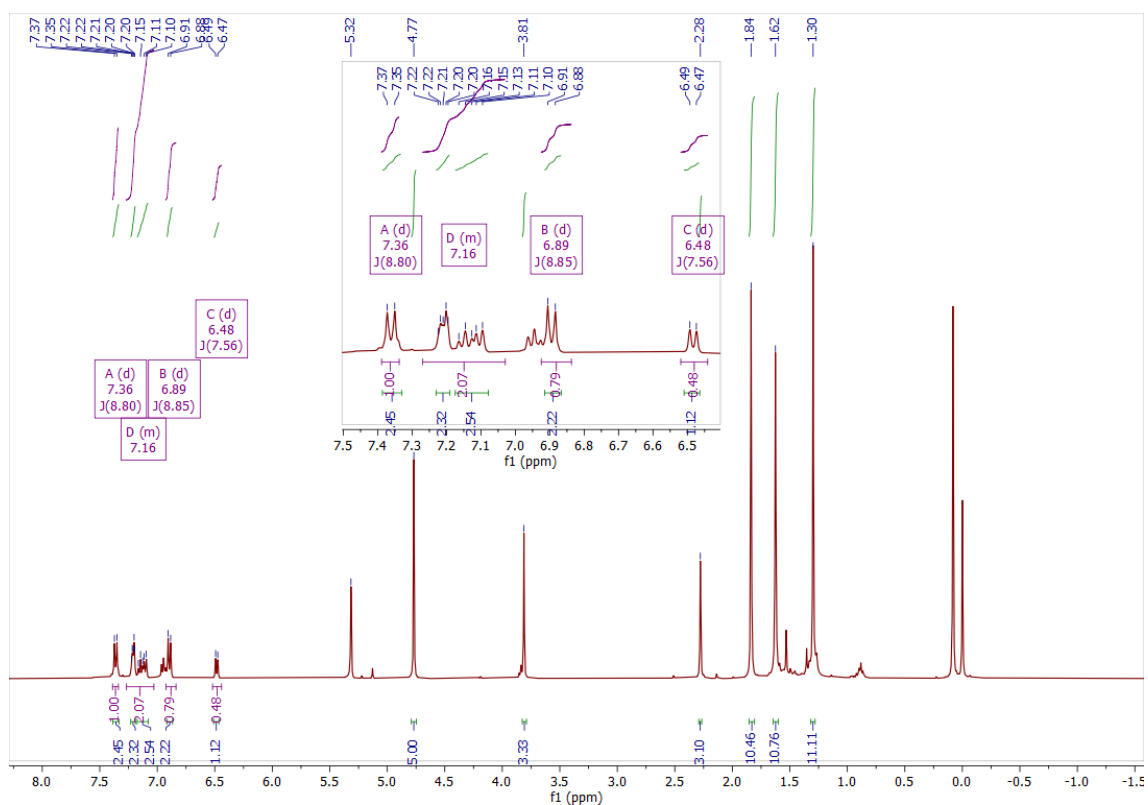

**Figure S39.**  $^1\text{H}$  NMR spectrum of compound **7a.3** ( $\text{CD}_2\text{Cl}_2$ ).

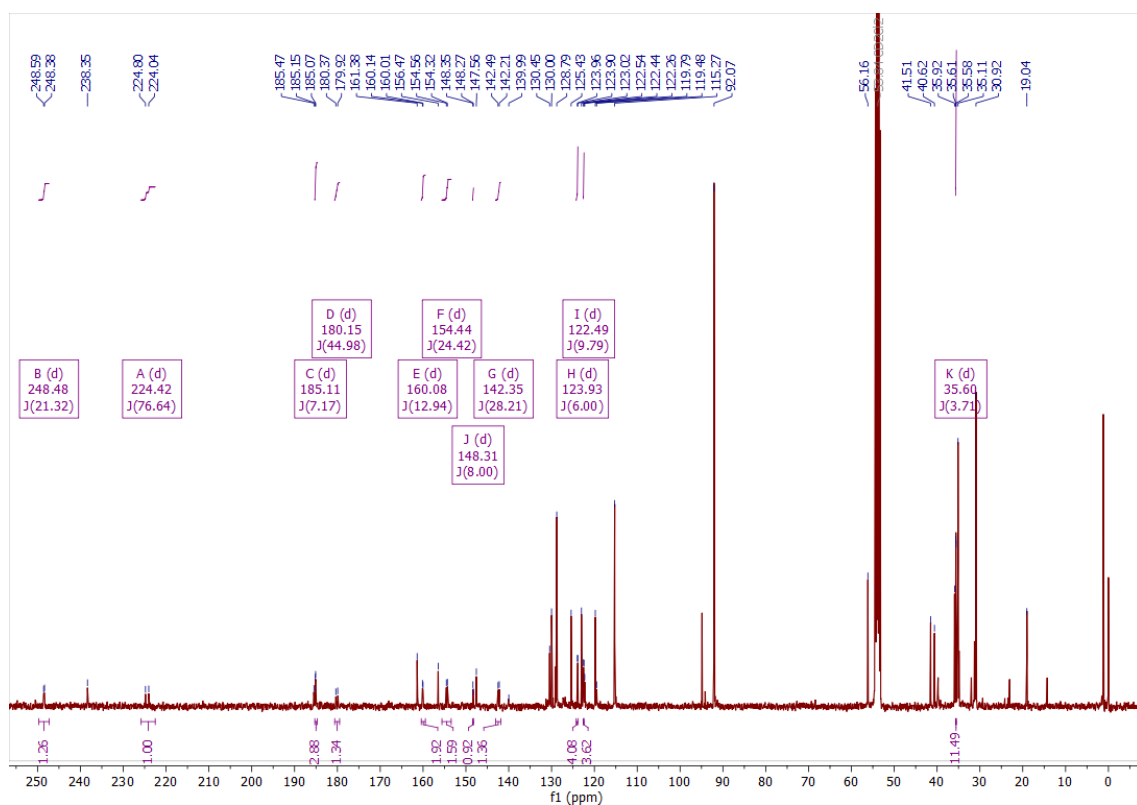

**Figure S40.**  $^{13}\text{C}\{^1\text{H}\}$  NMR spectrum of compound **7a.3** ( $\text{CD}_2\text{Cl}_2$ ).

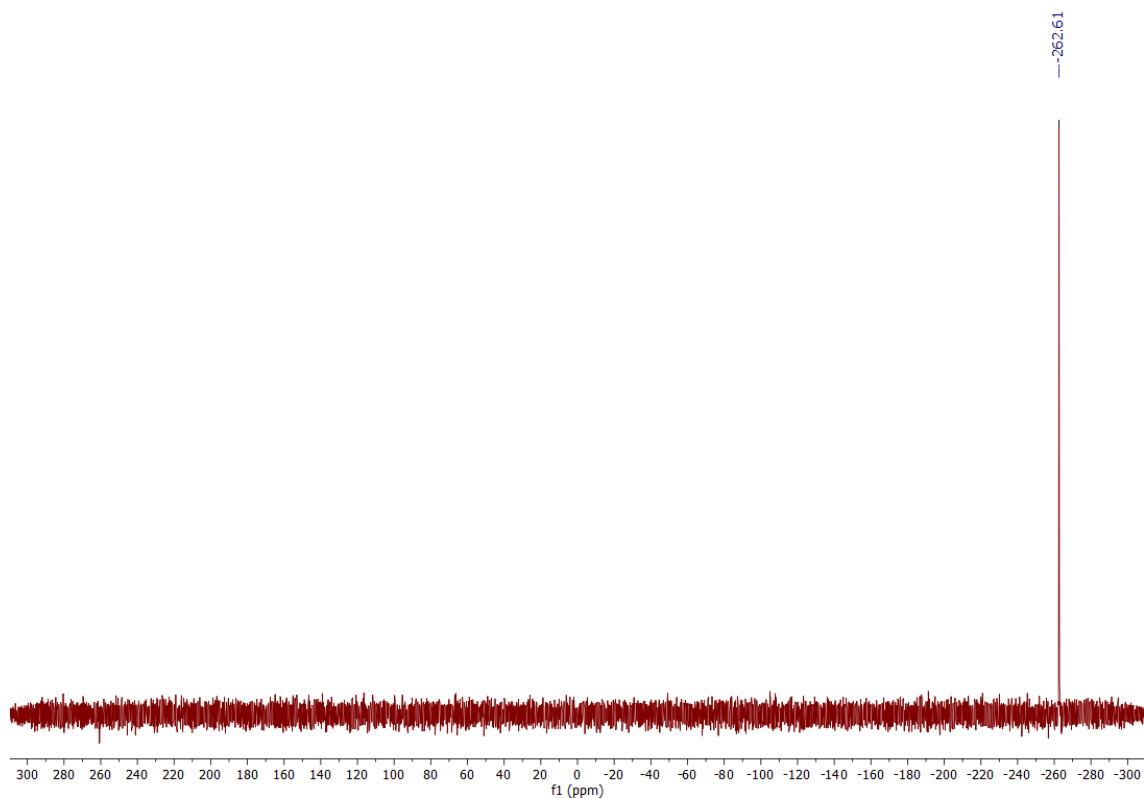

**Figure S41.**  $^{31}\text{P}\{^1\text{H}\}$  NMR spectrum of compound **7a.4** ( $\text{toluene-}d_8$ ).

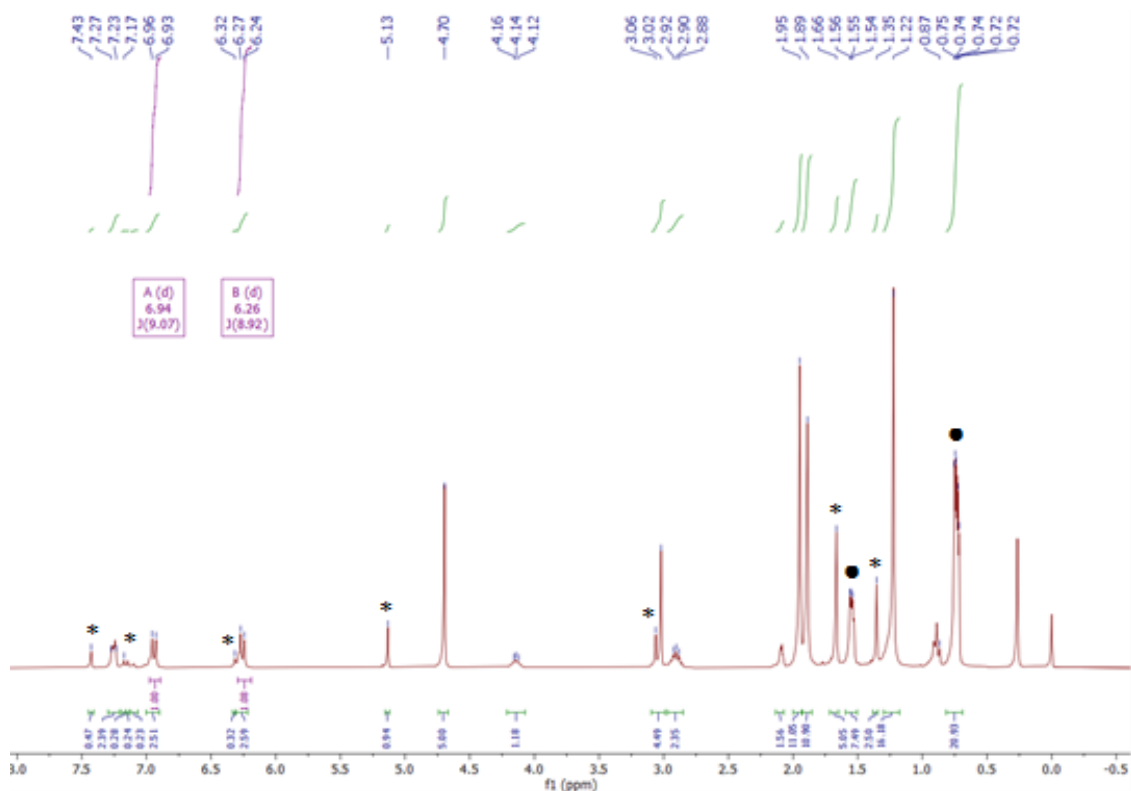

**Figure S42.**  $^1\text{H}$  NMR spectrum of crude compound **7a.4** ( $\text{toluene-}d_8$ ), with resonances of the parent compound **5a.1** (\*) and free  $\text{CN}^i\text{Pr}$  (●) marked.

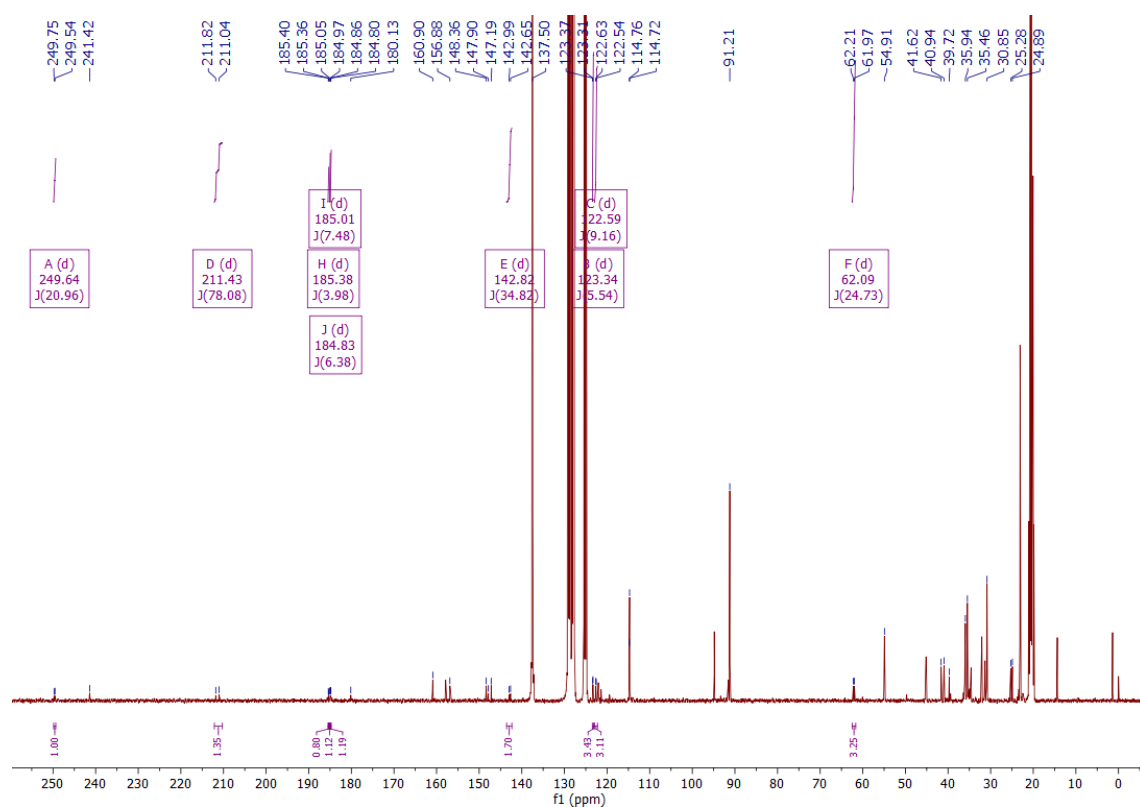

**Figure S43.**  $^{13}\text{C}\{^1\text{H}\}$  NMR spectrum of crude compound **7a.4** (toluene- $d_8$ ).



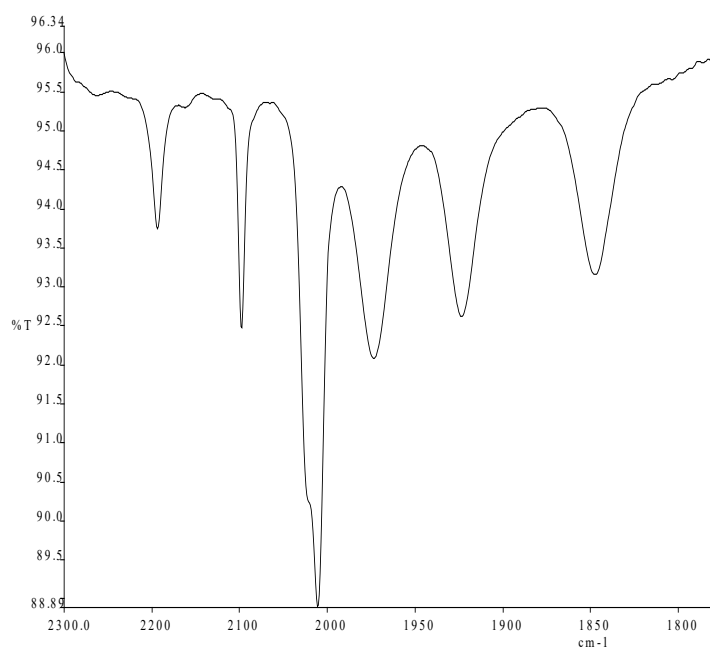

**Figure S44.** IR spectrum of compound **7a.5** in dichloromethane solution.

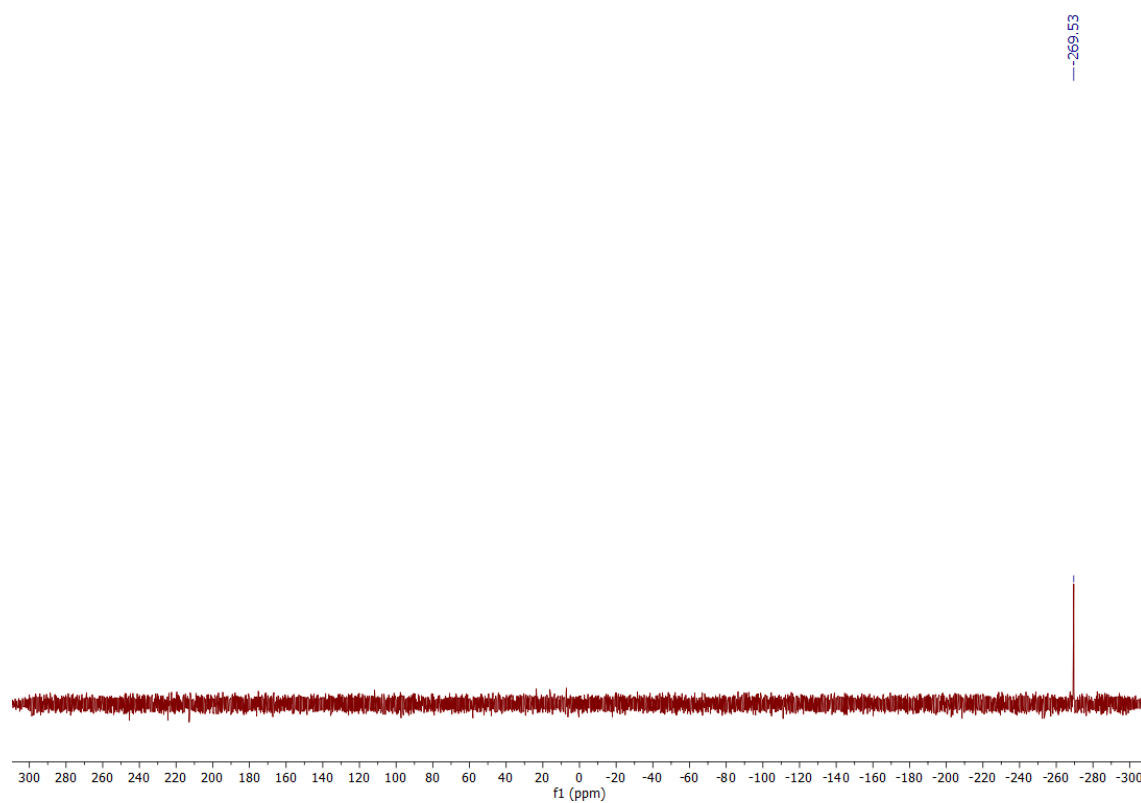

**Figure S45.**  $^{31}\text{P}\{^1\text{H}\}$  NMR spectrum of compound **7a.5** ( $\text{CD}_2\text{Cl}_2$ ).

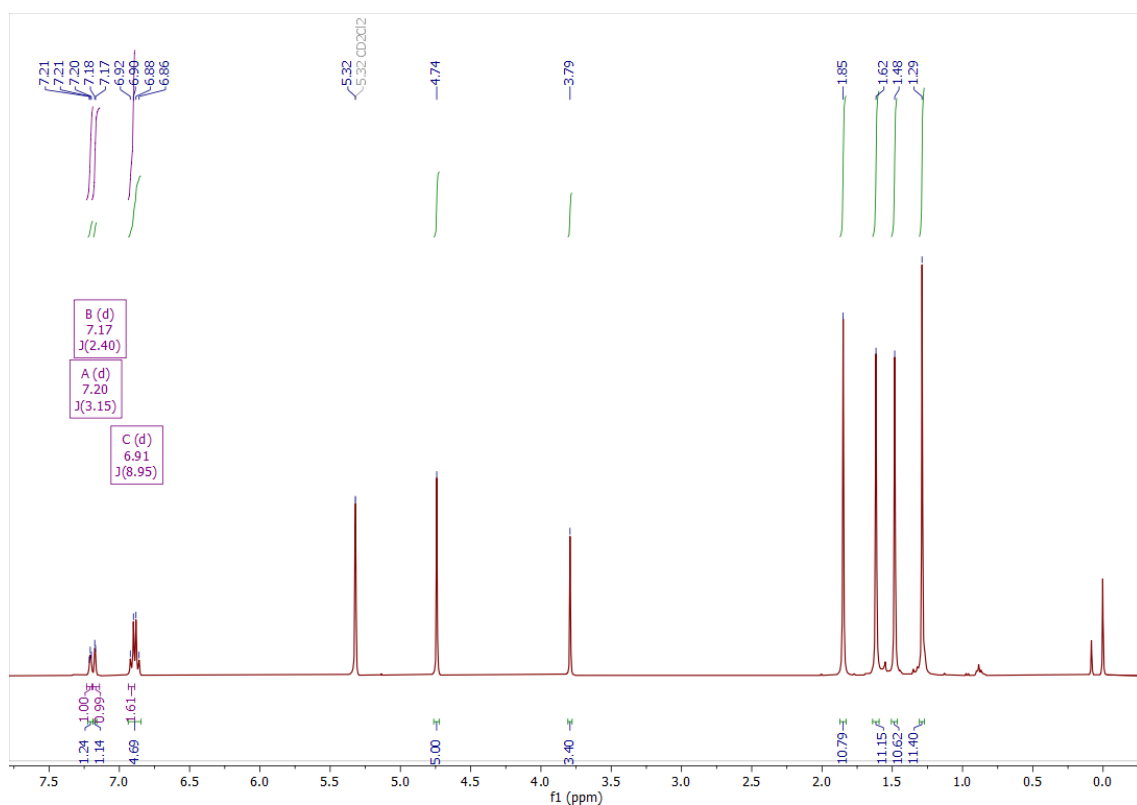

**Figure S46.** <sup>1</sup>H NMR spectrum of compound **7a.5** (CD<sub>2</sub>Cl<sub>2</sub>).

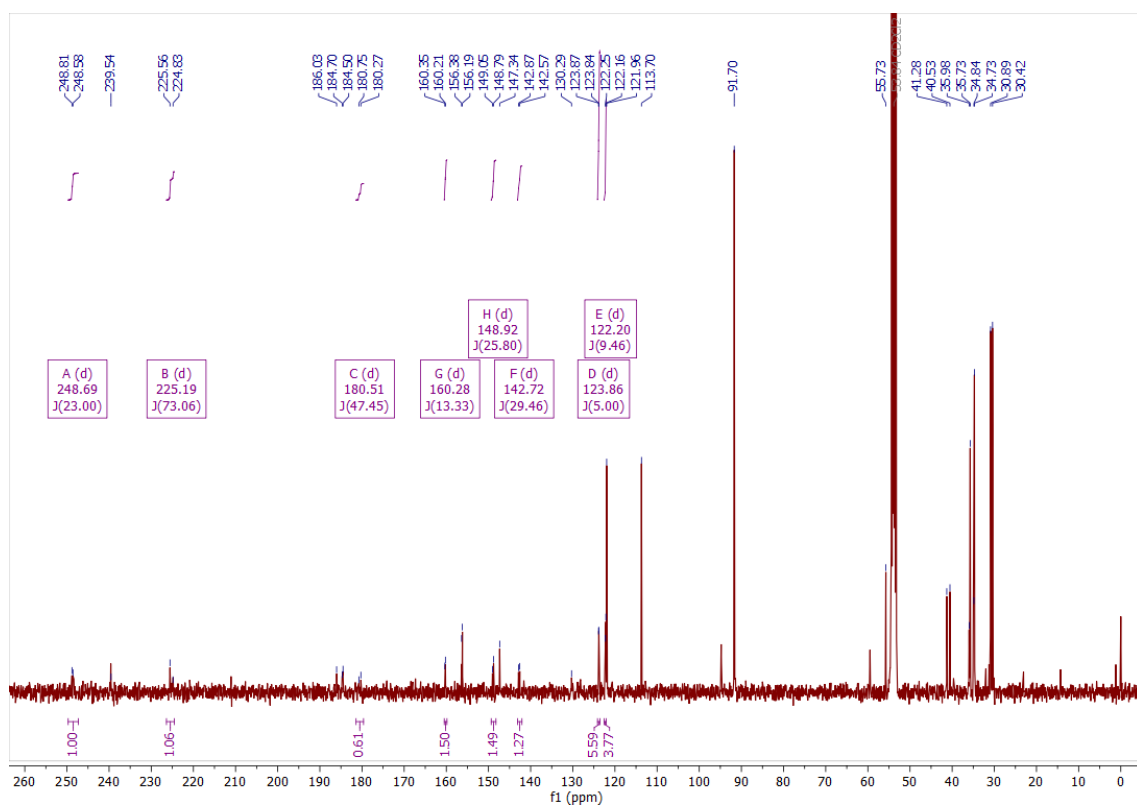

**Figure S47.** <sup>13</sup>C{<sup>1</sup>H} NMR spectrum of compound **7a.5** (CD<sub>2</sub>Cl<sub>2</sub>).

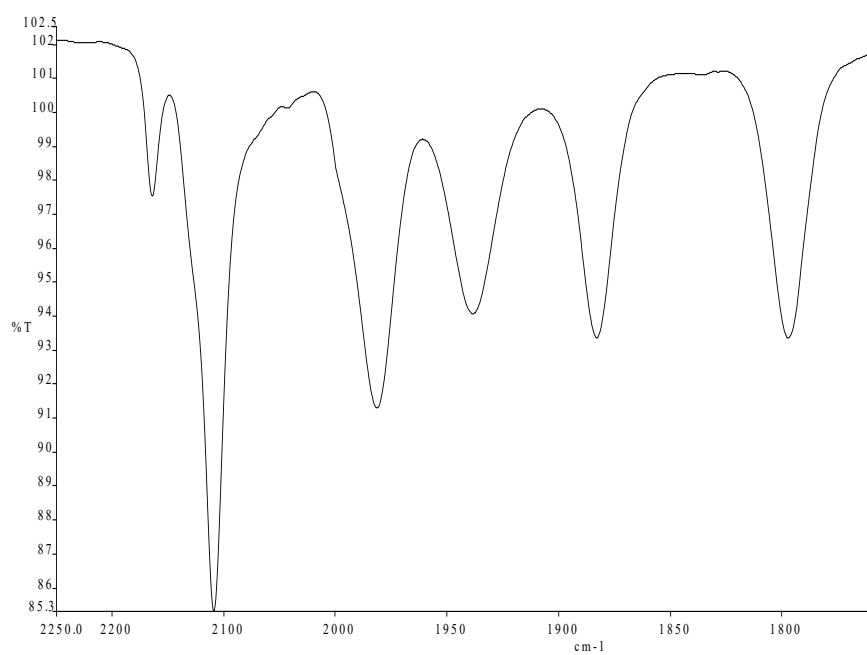

**Figure S48.** IR spectrum of compound **8b.1** in dichloromethane solution.

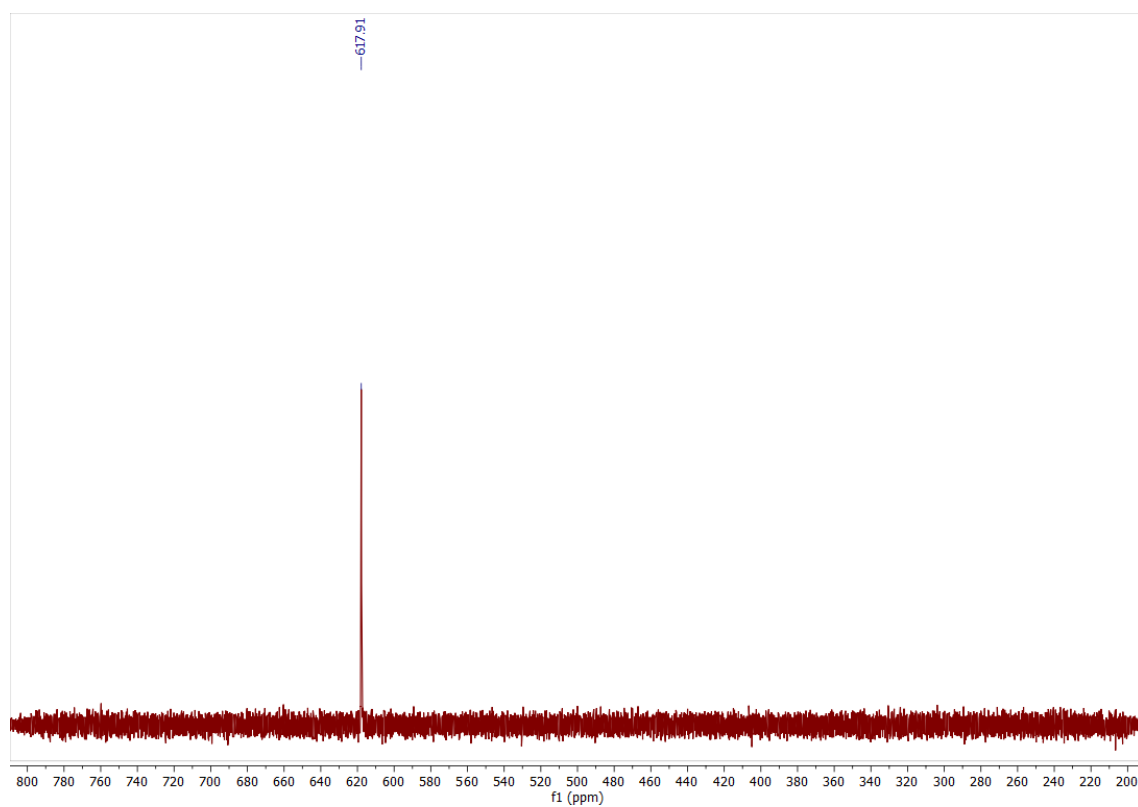

**Figure S49.**  $^{31}\text{P}\{^1\text{H}\}$  NMR spectrum of compound **8b.1** ( $\text{CD}_2\text{Cl}_2$ ).

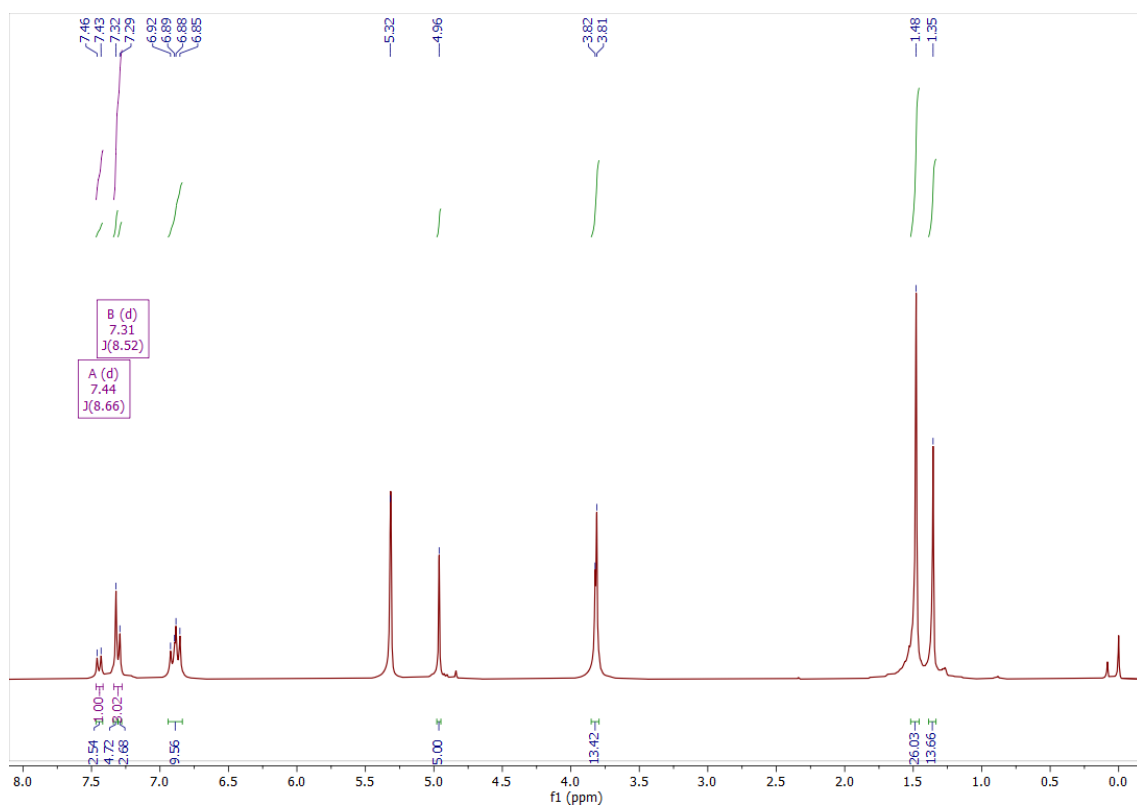

**Figure S50.** <sup>1</sup>H NMR spectrum of compound **8b.1** (CD<sub>2</sub>Cl<sub>2</sub>).

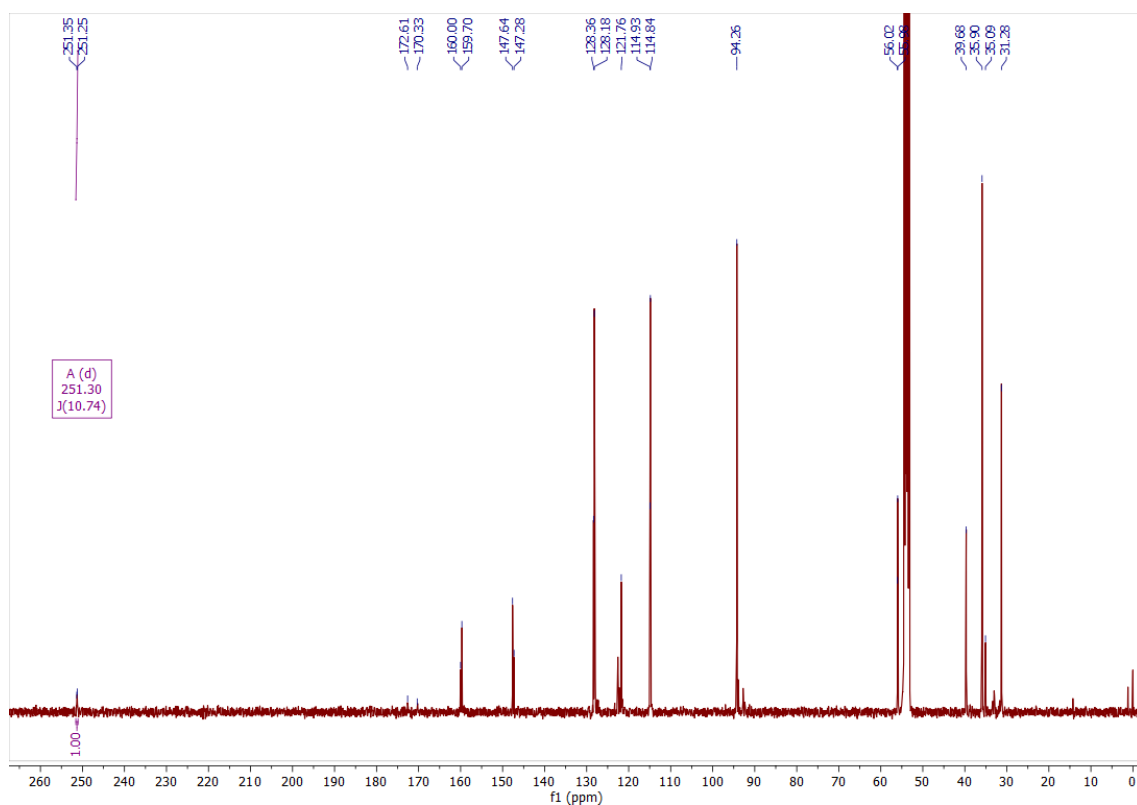

**Figure S51.** <sup>13</sup>C{<sup>1</sup>H} NMR spectrum of compound **8b.1** (CD<sub>2</sub>Cl<sub>2</sub>).
